# Supplementary material for: Aboveground mechanical stimuli affect belowground plant-plant communication
Source: PLoS One. 2018 May 2;13(5):e0195646. doi: 10.1371/journal.pone.0195646 (PMC5931455; doi:10.1371/journal.pone.0195646)
Supplement: S2 File — (XLSX) [file pone.0195646.s004.xlsx]

## Sheet: root fractions
Block	Tretment	Tank	AvgDiam	LenPerVol	RootVolume	Total length	1st class	2nd class	3rd class	4th class	5th class	6th class	7th class
1	T	1	0.5364	354.0	0.8	353.5	112.78	106.6	19.99	61.05	44.82	6.150	2.060
1	T	1	0.5626	371.6	0.923	371.0	117.33	105.3	14.49	77.10	49.86	3.337	3.574
1	T	1	0.5749	358.7	0.931	358.5	103.10	113.0	16.03	55.59	60.87	8.009	1.857
1	T	1	0.5672	359.2	0.907	359.0	92.75	110.0	28.30	67.52	53.13	5.701	1.543
1	C	2	0.5679	343.1	0.869	342.6	78.10	121.0	44.19	55.10	33.24	8.330	2.718
1	C	2	0.5963	328.0	0.916	327.9	73.52	103.5	31.29	65.04	45.80	5.763	2.977
1	C	2	0.5263	456.4	0.993	455.8	118.32	184.6	28.45	63.56	48.94	8.265	3.669
1	C	2	0.5868	295.8	0.8	295.6	39.93	121.2	56.42	26.07	40.65	8.646	2.702
2	T	3	0.5192	383.2	0.811	382.9	136.60	117.9	18.03	52.58	49.04	6.953	1.862
2	T	3	0.4832	303.9	0.557	303.7	118.50	85.1	12.39	59.84	25.01	1.826	1.076
2	T	3	0.5207	303.8	0.647	303.6	88.18	106.5	24.60	37.80	41.39	3.840	1.282
2	T	3	0.5152	328.7	0.685	328.4	95.02	113.5	15.57	69.70	29.09	3.729	1.746
2	C	4	0.54	399.6	0.915	399.4	119.44	137.2	18.01	64.33	50.41	7.947	2.046
2	C	4	0.5282	420.5	0.921	420.4	118.91	150.0	27.82	69.97	42.56	9.289	1.860
2	C	4	0.4954	371.9	0.717	371.4	126.21	117.1	15.71	71.54	36.18	2.160	2.513
2	C	4	0.4996	494.6	0.97	494.4	163.27	180.4	21.89	68.50	50.51	6.983	2.777
3	T	5	0.4942	147.7	0.283	147.7	51.11	46.3	5.99	28.03	14.55	0.601	1.141
3	T	5	0.4725	392.3	0.688	391.8	132.70	139.3	24.80	53.78	34.88	5.143	1.136
3	T	5	0.5014	349.8	0.691	349.1	131.68	95.9	15.75	61.73	39.16	3.678	1.142
3	T	5	0.5159	347.7	0.727	347.5	112.33	111.0	28.98	49.48	36.57	7.588	1.575
3	C	6	0.6081	247.4	0.7180	247.1	74.98	55.0	11.21	56.09	44.40	3.421	1.981
3	C	6	0.4993	329.7	0.6460	329.6	100.87	120.1	28.27	36.49	38.30	3.686	1.886
3	C	6	0.5578	318.9	0.7790	318.8	85.06	106.5	20.97	48.88	53.54	2.536	1.336
3	C	6	0.5661	315.7	0.795	315.4	99.21	86.5	18.80	53.16	51.91	3.556	2.215
4	T	7	0.5279	291.9	0.639	291.8	98.64	97.8	14.32	29.86	44.15	5.023	2.020
4	T	7	0.5109	347.5	0.712	347.1	142.40	79.2	14.42	59.93	47.58	2.347	1.328
4	T	7	0.5337	252.9	0.566	252.6	95.02	69.2	7.48	37.40	39.61	2.705	1.219
4	T	7	0.5127	266.4	0.55	266.1	74.53	105.5	20.03	28.47	32.05	4.142	1.404
4	C	8	0.3258	1050.7	0.876	1049.6	583.44	309.4	44.50	64.92	40.43	5.619	1.279
4	C	8	0.3611	938.1	0.961	936.5	463.47	297.6	47.95	72.35	47.06	5.433	2.645
4	C	8	0.3209	1028.8	0.832	1028.5	587.02	285.8	45.84	71.36	33.41	3.356	1.691
4	C	8	0.3483	767.5	0.731	766.7	404.21	231.5	26.03	66.25	31.50	5.612	1.645
5	T	9	0.5494	248.4	0.589	248.3	94.01	55.6	9.51	47.53	38.19	1.686	1.790
5	T	9	0.5362	256.9	0.58	255.1	67.12	80.8	28.10	41.04	35.05	1.513	1.454
5	T	9	0.524	272.2	0.587	272.1	80.02	89.3	27.66	36.52	34.03	3.211	1.431
5	T	9	0.5244	343.9	0.743	343.6	105.33	115.9	24.37	48.05	44.26	4.489	1.137
5	C	10	0.5357	230.9	0.52	230.8	69.47	72.4	8.16	51.43	26.02	2.343	0.959
5	C	10	0.4974	326.1	0.634	326.1	118.65	99.9	17.11	53.61	32.05	3.288	1.469
5	C	10	0.5168	346.3	0.726	346.0	95.35	127.5	32.53	49.82	35.63	3.361	1.777
5	C	10	0.4829	327.0	0.599	326.7	96.19	125.4	24.35	47.38	28.62	3.422	1.345

## Sheet: above grouth fractions
Block	treat	Tank	leaf Wt.	stem Wt.	root Wt.	TB	leaf area	stem Hg.	root area	SLA	S/R	LMF	SMF	RMF
1	T	1	0.0722	0.0417	0.0605	0.1744	31.0153	6.0205	21.2772	429.575	1.88264	0.413991	0.239106	0.346904
1	T	1	0.0633	0.0407	0.0582	0.1622	27.8082	5.9825	24.2855	439.308	1.78694	0.390259	0.250925	0.358816
1	T	1	0.09	0.0723	0.0679	0.2302	37.3286	6.4435	23.815	414.762	2.39028	0.390964	0.314075	0.294961
1	T	1	0.0764	0.0221	0.0619	0.1604	32.4893	6.3927	23.4513	425.253	1.59128	0.476309	0.137781	0.38591
1	C	2	0.0795	0.0414	0.0625	0.1834	33.4859	5.8551	21.6046	421.206	1.9344	0.433479	0.225736	0.340785
1	C	2	0.0747	0.0381	0.0625	0.1753	33.5665	6.0826	22.6828	449.351	1.8048	0.426127	0.217342	0.356532
1	C	2	0.0847	0.049	0.0682	0.2019	36.4813	7.0687	27.8725	430.712	1.96041	0.419515	0.242694	0.337791
1	C	2	0.0757	0.0416	0.0603	0.1776	33.5556	5.7957	19.7775	443.271	1.94527	0.426239	0.234234	0.339527
2	T	3	0.0742	0.0377	0.0618	0.1737	33.6269	5.3793	22.7809	453.193	1.81068	0.427173	0.217041	0.355786
2	T	3	0.0526	0.0265	0.0435	0.1226	25.7463	5.1235	16.7267	489.473	1.81839	0.429038	0.21615	0.354812
2	T	3	0.0604	0.0318	0.0486	0.1408	28.2422	5.3166	17.8215	467.586	1.89712	0.428977	0.225852	0.34517
2	T	3	0.0577	0.0321	0.0499	0.1397	27.4873	7.078	19.1428	476.383	1.7996	0.413028	0.229778	0.357194
2	C	4	0.0727	0.0372	0.0665	0.1764	29.9813	5.2241	24.5258	412.398	1.65263	0.412132	0.210884	0.376984
2	C	4	0.0847	0.0448	0.0709	0.2004	32.1828	5.4422	25.3498	379.962	1.82652	0.422655	0.223553	0.353792
2	C	4	0.0599	0.0295	0.0545	0.1439	25.8732	5.0473	21.035	431.94	1.64037	0.416261	0.205003	0.378735
2	C	4	0.0816	0.0515	0.0723	0.2054	32.2708	6.7992	28.1705	395.475	1.84094	0.397274	0.25073	0.351996
3	T	5	0.0349	0.015	0.0172	0.0671	18.0546	3.8523	8.3123	517.324	2.90116	0.520119	0.223547	0.256334
3	T	5	0.0538	0.0374	0.041	0.1322	31.1044	6.5547	21.3677	578.149	2.22439	0.406959	0.282905	0.310136
3	T	5	0.0584	0.036	0.0418	0.1362	31.1005	6.0832	20.2399	532.543	2.25837	0.428781	0.264317	0.306902
3	T	5	0.0697	0.0427	0.0476	0.16	35.232	6.5143	20.6349	505.481	2.36134	0.435625	0.266875	0.2975
3	C	6	0.0532	0.028	0.048	0.1292	26.3192	4.7237	17.2521	494.722	1.69167	0.411765	0.216718	0.371517
3	C	6	0.059	0.0289	0.051	0.1389	25.9077	4.3509	18.6108	439.114	1.72353	0.424766	0.208063	0.367171
3	C	6	0.0601	0.0356	0.056	0.1517	28.2722	5.4568	20.2577	470.419	1.70893	0.396177	0.234674	0.36915
3	C	6	0.0646	0.0316	0.0563	0.1525	29.6363	4.9951	20.1847	458.766	1.7087	0.423607	0.207213	0.36918
4	T	7	0.0668	0.0357	0.0483	0.1508	32.0219	4.7568	17.5186	479.37	2.12215	0.442971	0.236737	0.320292
4	T	7	0.068	0.0335	0.0495	0.151	32.7305	5.1096	20.2636	481.331	2.05051	0.450331	0.221854	0.327815
4	T	7	0.0536	0.0297	0.04	0.1233	27.2225	4.6726	15.2892	507.882	2.0825	0.434712	0.240876	0.324412
4	T	7	0.0476	0.0256	0.0414	0.1146	24.2572	4.6081	15.3705	509.605	1.76812	0.415358	0.223386	0.361257
4	C	8	0.0667	0.0356	0.0539	0.1562	31.4555	4.7774	39.9433	471.597	1.89796	0.427017	0.227913	0.34507
4	C	8	0.0643	0.033	0.0599	0.1572	28.5172	4.7231	39.4086	443.502	1.62437	0.409033	0.209924	0.381043
4	C	8	0.0543	0.0271	0.049	0.1304	26.4974	4.4124	38.0347	487.982	1.66122	0.416411	0.207822	0.375767
4	C	8	0.0594	0.0357	0.0451	0.1402	26.3535	5.3314	31.0162	443.662	2.10865	0.42368	0.254636	0.321683
5	T	9	0.0524	0.027	0.0365	0.1159	27.2728	4.5767	15.5785	520.473	2.17534	0.452114	0.232959	0.314927
5	T	9	0.0547	0.0266	0.0367	0.118	27.2749	4.1963	15.454	498.627	2.21526	0.463559	0.225424	0.311017
5	T	9	0.0641	0.032	0.0391	0.1352	31.5675	5.1329	15.966	492.473	2.4578	0.474112	0.236686	0.289201
5	T	9	0.0685	0.0392	0.0478	0.1555	31.8499	6.1579	20.4767	464.962	2.25314	0.440514	0.25209	0.307395
5	C	10	0.039	0.0206	0.0354	0.095	21.4696	3.7962	13.9905	550.503	1.68362	0.410526	0.216842	0.372632
5	C	10	0.0532	0.0263	0.046	0.1255	26.4942	4.0629	18.2696	498.011	1.72826	0.423904	0.209562	0.366534
5	C	10	0.0516	0.0176	0.0493	0.1185	26.5105	4.3012	19.8335	513.769	1.40365	0.435443	0.148523	0.416034
5	C	10	0.0454	0.0245	0.0424	0.1123	22.7195	4.3072	17.7864	500.43	1.64858	0.404274	0.218166	0.37756
