# Supplementary material for: Aboveground mechanical stimuli affect belowground plant-plant communication
Source: PLoS One. 2018 May 2;13(5):e0195646. doi: 10.1371/journal.pone.0195646 (PMC5931455; doi:10.1371/journal.pone.0195646)
Supplement: S5 File — (XLSX) [file pone.0195646.s007.xlsx]

## Sheet: Pos_data
		C_mean	stdev	T_mean	stdev	C1	C2	C3	C4	C5	C6	C7	C8	T1	T2	T3	T4	T5	T6	T7	T8	mzmed	mzmin	mzmax	rtmed	rtmin	rtmax	npeaks	Control	Treatment
FT001	mz_68.99-271s	45733	17711.4	31508	13855.3	59663.6	43157.9	49236.7	59371.5	48774.8	53735	47662.5	4261.78	15461.7	7114.61	45544	36247.1	28290.3	36823.6	45860.2	36722.7	68.9939	68.9937	68.9942	270.935	270.26	270.949	9	6	3
FT002	mz_81.94-271s	32135.3	12066.9	27878.3	12072.5	37621.7	34821.1	38907.4	36746.7	2477.15	36139.8	34639	35729.8	16113.7	36473.8	3017.64	36808.6	36045.3	30434.7	33017.8	31114.7	81.9374	81.9369	81.9379	270.92	269.143	271.006	16	8	6
FT003	mz_87.51-270s	21335	9133.68	23227.4	2905.89	24521.4	24996.4	27879.3	26228.2	30042.1	23054.8	8136.26	5821.75	19505.5	27039.7	25962.9	26001.5	20480.3	23401.1	20412.6	23015.2	87.509	87.5086	87.5095	269.541	268.423	270.936	13	5	6
FT005	mz_89.01-270s	47960.7	34648.3	20295.2	29015.9	74881.5	70514.3	3799.31	10896.7	68203.1	77243.9	73864.8	4281.6	71009.8	3787.37	3390.16	3995.92	4316.71	63216.3	4141.6	8503.56	89.0081	89.0077	89.0086	270.337	268.545	270.96	25	8	8
FT006	mz_89.51-271s	2.36379e+06	199393	2.33531e+06	217706	2.30694e+06	1.99677e+06	2.31886e+06	2.53136e+06	2.61922e+06	2.52977e+06	2.23212e+06	2.37525e+06	2.42889e+06	2.5176e+06	2.58015e+06	2.43509e+06	2.3029e+06	1.99291e+06	2.40146e+06	2.02351e+06	89.5068	89.5064	89.5072	270.935	270.281	270.949	16	8	8
FT007	mz_89.51-2s	298403	93043	472355	326389	314615	441741	360353	111176	276501	306068	279457	297309	302323	318262	290870	964293	1.03565e+06	290988	280947	295504	89.5064	89.5062	89.5065	1.75471	0.950478	8.64047	13	4	7
FT008	mz_90.01-271s	167346	95904.9	195568	11786.1	245735	222807	14648	234425	14037.5	210868	192884	203365	174637	200553	207215	206706	202466	182535	199219	191216	90.0076	90.0071	90.008	270.92	269.542	271.006	18	8	8
FT009	mz_90.51-270s	1.26875e+06	76618	1.29664e+06	65157.3	1.19122e+06	1.12331e+06	1.26471e+06	1.32559e+06	1.26818e+06	1.34524e+06	1.30191e+06	1.32984e+06	1.29033e+06	1.35864e+06	1.37119e+06	1.34993e+06	1.32017e+06	1.23836e+06	1.18748e+06	1.257e+06	90.5069	90.5065	90.5073	269.551	268.543	271.006	26	8	8
FT010	mz_90.98-245s	40563.9	34387.6	82868.2	61700.5	40326.3	50044.6	21555.8	117285	14905.1	47835.9	21253.8	11305.1	15024.8	50843.6	43656.4	50502.6	107816	49611.1	189344	156147	90.9766	90.9764	90.9769	244.587	214.952	262.968	27	4	3
FT011	mz_90.98-5s	76255	8515.19	75581.9	5658.77	67708.2	69982.5	74262.6	69876.4	82102.7	70037.6	87797.8	88272.6	86917.8	74679.8	71461	71824	75233.2	79994.2	75607.7	68937.9	90.9767	90.9767	90.9767	4.89287	4.41521	4.93633	13	6	7
FT012	mz_91.01-269s	79665.4	5266.93	81465.9	4933.14	77737.5	74148.4	84382.2	86890.7	72238.7	77312.5	84644.6	79968.3	79210.2	82168.2	90463.5	84930.5	82753.3	74062.1	77681.6	80457.9	91.0077	91.0073	91.0081	268.985	268.546	270.935	19	8	8
FT013	mz_91.5-270s	289672	225239	231543	229599	437364	451346	17314.6	18556	457091	447694	470198	17815.2	442733	16954	458556	15532.3	17240.6	420564	462140	18624.8	91.5044	91.5041	91.5049	269.986	268.346	270.949	25	8	8
FT014	mz_92.01-269s	45725.3	3332.47	46186	2274.52	40697.5	42975.8	42247.1	47312.3	46557.3	50071.8	47415.7	48525.4	45010	47623.8	47354.6	42953.2	48604.8	43035.6	46462.6	48443.3	92.0052	92.0047	92.0056	269.262	268.545	270.949	22	8	8
FT015	mz_92.5-269s	61342.4	3338.49	61073.2	2149.36	58134.4	55525	61238.3	64263.1	65909.9	63217.9	61909.9	60540.9	57153.5	64184.2	60266	59996.6	61094.3	60961.9	61569.8	63359.1	92.5031	92.5027	92.5036	268.944	268.544	270.949	21	8	8
FT016	mz_93.5-269s	32951.9	4565.17	29626.8	2928.28	35324.5	29431.7	37247	36233.4	35670.3	23572.1	31793.4	34342.9	27990.9	26770.6	33773.8	33176.1	32144.8	27616.6	28801.2	26740.3	93.5032	93.5027	93.5036	269.332	268.744	271.006	20	6	6
FT017	mz_95.95-271s	13818.6	6253.44	14583.5	6751.06	14103.7	14242.9	4433.71	16690.7	19709.8	4155.6	17336.2	19876.5	8057.61	22318.5	15466	19199.6	15184.8	19048.5	15939	1453.5	95.953	95.9525	96.0106	270.935	269.142	270.949	13	6	4
FT018	mz_96.51-269s	15499.8	3521.79	13150.4	5014.05	12077.2	10209.6	16697.7	19547.2	13938.1	13824.1	17963.6	19740.9	5059.7	15189.8	18721.5	9657.49	10110.5	10537.3	17360.9	18566.2	96.514	96.5135	96.5145	268.741	268.146	270.936	11	5	5
FT019	mz_97.51-271s	40746.1	23296	42338.1	21724	49483.8	48902.7	3371.06	57682.3	3234.15	55361.3	52963.4	54970.2	49716.7	56645.3	5193.9	57010.2	10191.2	49573.9	59277.9	51095.3	97.5137	97.5133	97.5141	270.786	269.541	271.006	19	8	8
FT020	mz_97.95-271s	53305	75755.1	71425.8	82795.1	20674.5	16283.2	1615.08	20244.5	16490.5	180158	477.6	170496	15008.2	168142	173949	171615	718.788	12431.2	14968.3	14574.2	97.9531	97.9316	97.9692	270.905	268.247	270.96	46	8	8
FT021	mz_98.01-270s	29917.7	1825.65	31232.1	1354.48	29448.7	27519.9	28985.5	30113.8	29168.7	33679.1	31099.4	29326.9	30122.7	29515.1	30678.4	31756.5	30206	31417.8	32793.3	33366.8	98.0131	98.0127	98.0136	269.641	268.545	270.949	22	7	8
FT022	mz_98.51-271s	846560	481610	924215	353181	1.14536e+06	1.10523e+06	68183	1.06671e+06	67973.6	1.05579e+06	1.11401e+06	1.14923e+06	1.00991e+06	1.11326e+06	63017.7	1.02697e+06	998091	958063	1.12912e+06	1.09529e+06	98.5116	98.5111	98.512	270.737	269.143	271.006	19	8	8
FT023	mz_98.51-2s	158848	9569.59	241027	209994	143121	152516	167074	174150	161927	161369	152973	157657	154981	145054	152720	712646	319485	24587.6	150891	267851	98.5113	98.5112	98.5114	1.95	1.1558	7.68072	10	4	6
FT024	mz_98.96-270s	42804.1	44413.3	63513.6	36625.4	58080.5	86118.9	2848.09	101867	3725.28	1219.47	3344.8	85228.3	64757.2	90943.3	2901.42	89364.3	92547.6	60018.8	94096.5	13479.7	98.9618	98.9608	99.0129	270.443	268.543	270.96	39	8	8
FT025	mz_99.51-269s	670811	55523.5	702349	43317.7	580567	612443	717626	665334	671358	661553	706500	751110	664040	713003	713223	681760	673767	650590	744063	778347	99.5117	99.5113	99.5122	269.254	268.512	270.949	24	8	8
FT028	mz_100.51-269s	253334	27068.4	274020	9976.09	211043	224287	258624	237943	261955	261956	282072	288792	268191	282219	284092	276546	273543	255073	268551	283943	100.509	100.509	100.51	269.362	268.543	270.936	24	8	8
FT029	mz_100.96-269s	21205.6	6261.34	22111.5	8011.68	22176.9	24024.8	26028.4	11068.4	25507	25010.2	11400.1	24429.1	2559.14	25436.8	25968.2	25102.3	22586.5	23635.8	24716	26887	100.956	100.956	100.957	269.461	268.545	271.006	18	6	8
FT030	mz_101.01-269s	25237	2739.71	25857.8	2895.63	20747.1	21854.8	28491.5	24136.2	26342.5	26566.7	27495.3	26261.7	25068.1	26792.3	25052.9	27019.7	26476	25939.7	20056.4	30457	101.01	101.01	101.01	268.985	268.346	270.935	19	8	8
FT031	mz_101.51-269s	33091.9	5197.01	36782.2	2517.74	28629.1	29199	24990.8	35781.5	36631.4	31950.6	37621.9	39931.3	36954.5	40726.8	37793.5	36935.6	38511.2	32389	36478.8	34467.9	101.508	101.508	101.509	268.943	268.545	270.936	13	6	6
FT032	mz_102.51-270s	13257.9	3184.72	15307.5	2486	11651.3	13886.3	17001.7	7965.94	9904.14	13819	16298.5	15536.6	17204.8	15794.6	18028.9	10605.7	13162.7	14977	17579.4	15107.5	102.508	102.508	102.508	269.541	268.345	270.96	13	3	5
FT033	mz_103.96-257s	822946	214282	730712	260941	616041	463122	833968	707733	945191	924238	1.11896e+06	974313	976074	921017	996915	565281	772536	867280	318108	428488	103.955	103.955	103.956	256.621	253.406	258.14	12	7	5
FT035	mz_108.96-271s	30051.5	9629.14	34853.1	9643.31	27452.2	25884.7	34721	34548.2	36794.6	37408.4	34976.5	8626.05	32202.2	37095.8	40911.6	13370.4	39538.2	32153.7	38985.7	44567.4	108.961	108.961	108.962	270.936	270.905	271.006	14	7	7
FT037	mz_110.01-7s	92062.5	15098.2	113798	37842.4	93925.6	120376	78968.7	90771.9	99717.6	80430.2	72855.4	99455.1	91738	66732	142023	140060	165864	87914.6	73465.6	142583	110.009	110.008	110.009	7.07526	6.66697	7.22446	16	8	8
FT038	mz_110.01-269s	30762	6883.16	32620.6	2911.32	37628.7	31801.9	25578.3	33560.2	36938.7	36622.1	25305.5	18660.5	34062.5	34565.1	30036	35361.2	29231.8	28267.9	34588.8	34851.2	110.008	110.008	110.009	269.134	268.545	270.936	16	4	6
FT039	mz_111.02-269s	44105.3	21634.3	49354.2	3560.55	56071.9	50739.6	56701.7	3105.14	53813.4	58055.6	16386	57969	46095.6	52005.6	47596	53637	46270.4	53158	51367.3	44703.5	111.019	111.019	111.02	268.744	268.235	269.343	12	4	8
FT040	mz_112.02-269s	19363.1	5500.38	18055	4810.33	18416.8	20436.3	22492.7	7947.28	25949.3	21666	22213.1	15783.4	17653.8	20804.3	17113.8	17803.5	22471.5	21297.7	7150.06	20144.8	112.017	111.968	112.018	268.642	268.247	270.949	10	5	3
FT041	mz_113.96-271s	136082	102085	207559	11739.1	207228	201931	15233.1	24623.1	221189	410.172	198193	219849	192677	212227	221457	208842	210419	187133	217161	210557	113.963	113.94	113.964	270.935	269.079	270.949	19	8	8
FT042	mz_115.04-8s	30570.6	6874.47	25822.3	6880.69	19575.7	29092.3	32057.7	22401.7	32796.9	40697	35991.2	31952.3	32185.5	34288.8	25462.5	27847.3	14065.7	26824.3	28397.9	17506.8	115.036	115.036	115.036	7.55925	7.131	7.89396	12	6	6
FT043	mz_115.96-269s	52587.6	5969.21	56859.2	2657.41	40907.4	45698.7	54482.9	56585.3	57261.5	56443.7	54089.2	55231.8	56140.2	59203.8	59032.6	57687.9	53350.9	52392.9	58256.4	58808.6	115.964	115.963	115.964	269.442	268.543	270.949	22	8	8
FT044	mz_117.96-269s	21186.7	2679.92	21183.7	8492.29	16531.9	21694.5	24261.1	24569.5	19791.5	21608.6	19029.2	22007.4	18526.4	24149.8	27532.4	20612.7	26751.2	1795.5	27452.2	22649.7	117.959	117.959	117.96	268.943	268.345	270.936	15	6	6
FT045	mz_119.01-269s	16442.2	6650.36	21730.9	2450.33	1714.9	18012.5	16264	13235.2	20068.6	20537.8	23207.4	18497.1	17874.1	24659.6	18528.5	24059.1	22292.1	22605.1	22851.1	20977.8	119.013	119.012	119.013	268.924	267.748	270.936	14	5	6
FT046	mz_122.96-271s	157910	89730.9	190552	12103.6	227532	200301	13262.2	210848	13585.3	203841	195662	198251	182692	201382	199491	201260	200414	171899	191093	176188	122.964	122.963	122.964	270.906	269.542	271.006	18	8	8
FT047	mz_124.96-270s	43579.9	26026	32321.1	31146.2	48359.3	60456.4	2764.51	70552.5	42519.6	55409	63671.6	4906.1	64382.7	1662.84	4690.03	53523	4585.76	59177	67691.1	2856.04	124.964	124.964	124.964	269.992	268.322	270.936	22	7	7
FT048	mz_125.99-7s	42251.8	22990	108612	108616	75757.2	79294.7	32198.6	46966.9	27692.5	28275.9	22946.1	24882.5	29197.3	28181	104413	46426	265494	74313.4	28597.5	292273	125.986	125.986	125.986	6.87289	6.134	7.089	14	6	8
FT049	mz_125.99-269s	13615.3	5244.31	12827.8	2846.24	14672.2	13953.4	18383.7	15176.4	11777.1	16462.2	1616.75	16881	9033.65	16344.9	14185	15893.4	14388.6	12813.3	9802.52	10160.7	125.986	125.985	125.986	268.818	268.543	270.936	12	7	4
FT050	mz_130.01-271s	34320.1	15187.9	66576.6	70784.3	37445.2	28030	48475.9	39910.2	46450.5	39909.4	330.977	34008.8	24752.9	34069.7	35072.4	28732.9	173492	18468.3	188055	29969.6	130.008	129.987	130.008	270.92	212.961	271.006	14	5	5
FT051	mz_131.93-271s	12297.3	4701.16	14172.1	3701.86	14156.1	15407.6	11770	6539.54	14073.2	20073.7	5876.73	10481.4	9988.53	14642.7	18553.3	18575.5	17799.9	10530.7	11192.6	12093.6	131.929	131.929	131.93	270.936	270.936	270.96	5	1	4
FT052	mz_138.98-269s	39146.5	3589.59	41331.9	1431.98	33928.3	34343.3	41079.5	36718.8	42740.6	41705.2	40527.3	42128.8	39000.5	41161.8	41091	41784.4	41546.6	40654.1	41236.7	44180.1	138.98	138.979	138.98	269.183	268.546	271.006	21	8	8
FT054	mz_140.99-269s	40847.3	3693.22	41839.1	3007.91	37073.6	35536.8	44824.2	42941.2	38565.9	41857.5	45941.9	40037.5	39297.9	45278.5	43002.9	42324.3	44213.1	38353.8	37611	44631.2	140.995	140.961	140.996	268.942	268.345	270.935	31	8	8
FT055	mz_141.96-7s	1.27887e+06	956549	1.56065e+06	932673	2.93674e+06	592226	856049	2.0797e+06	2.13812e+06	534520	530239	563351	1.02743e+06	441598	807265	2.78503e+06	2.32911e+06	662928	1.87628e+06	2.55554e+06	141.959	141.958	141.959	7.2862	1.48704	21.0804	27	8	8
FT056	mz_141.96-271s	1.46328e+06	116735	1.38773e+06	84322.6	1.54585e+06	1.35392e+06	1.5355e+06	1.55013e+06	1.58186e+06	1.51826e+06	1.30873e+06	1.31202e+06	1.25765e+06	1.42413e+06	1.48896e+06	1.46089e+06	1.42343e+06	1.26953e+06	1.40703e+06	1.37022e+06	141.959	141.958	141.959	270.935	270.139	270.96	16	8	8
FT057	mz_142.96-271s	52338.6	21178.8	50676.9	16629.1	59623.8	56209.5	63493.3	61320.2	64991.3	53163.1	767.2	59140.4	52585.9	58784.8	62327.9	10695	56388.7	49464	56467.6	58701.4	142.961	142.96	142.991	270.92	268.346	271.006	24	7	7
FT058	mz_143.96-270s	130346	98021.7	88093.2	91718.2	186770	188241	8252.13	210136	8962.16	218687	200724	20994.6	193063	34369.2	9288.52	208521	28554.1	192927	28699.2	9322.75	143.959	143.958	143.96	270.139	268.545	271.006	25	8	8
FT059	mz_144.98-254s	1.80095e+06	932881	1.60484e+06	649813	1.02221e+06	1.99346e+06	1389.42	3.17235e+06	2.13819e+06	1.85767e+06	2.21065e+06	2.01172e+06	2.22961e+06	917944	1.85346e+06	698752	2.03941e+06	2.19871e+06	2.00793e+06	892934	144.982	144.961	144.983	254.478	200.215	270.538	20	7	7
FT060	mz_145.95-269s	71179	4663.6	73442.1	2742.99	66221.2	62775.7	74875	75306.3	75392.9	70869.6	70102.9	73888.9	71463	70603.9	75559.6	74401.6	73168.1	69900.4	74318.2	78122.3	145.954	145.954	145.955	269.183	268.744	270.906	21	8	8
FT061	mz_146.98-255s	577246	350475	516742	424417	336236	436266	476293	475089	970204	883340	1.02358e+06	16962.3	1.10662e+06	16217	17354.1	264095	864962	659125	292238	913322	146.98	146.98	146.981	255.039	253.406	258.656	15	8	7
FT062	mz_149.02-136s	16988.3	2756.47	17191.9	1504.97	16808	11951.1	17854.4	15458.7	19099.5	19761.3	19940.9	15032.3	15569.2	17354.9	19272.9	15828.3	16157.1	16623.3	17169	19560.5	149.023	149.023	149.059	136.444	111.735	137.042	16	7	8
FT063	mz_149.02-77s	22114.9	6698.19	20040.1	6437.91	14281.8	21082.3	21079.3	12150.1	21821.8	30448.2	30458.1	25597.6	9284.72	26455.2	14214.3	28775.5	21393.5	20905.8	16471.4	22820.7	149.023	149.023	149.023	77.4735	77.3635	77.6708	12	6	6
FT064	mz_149.99-271s	31661.9	9751.44	38486.4	8217.74	21371.4	17813.6	37728.8	35952.7	40293.7	39413	21012.9	39709	19135.4	39084.8	41974.9	42835.2	41757.9	36113	43888.1	43101.8	149.987	149.952	149.988	270.935	268.744	271.006	25	8	8
FT065	mz_151.03-7s	30318	4769.06	36312.5	13397	34072.7	38626.8	28543.7	30160.2	32735.9	26829.9	23157.3	28417.3	30297.9	21401.1	46115.3	41430.3	54334.4	23525	22788.6	50607.1	151.035	151.035	151.035	7.08476	6.47719	7.28562	14	7	7
FT066	mz_151.51-40s	19033.8	14710.8	11482.1	8880.89	46017.9	7964.84	24510.1	13092.4	32684.2	11126.5	16357.4	516.988	19106.1	878.879	21994.6	21024.5	9663.63	14469.2	3168.17	1551.51	151.514	151.514	151.514	40.0406	39.5941	40.2595	8	5	3
FT067	mz_154.97-270s	45921.3	15876.4	45966.1	17869.1	48875.5	45974.5	7626.49	53204.5	55483.4	56501	50821	48883.7	48502.7	53191.2	53804.5	52571.6	2324.32	47862.4	52569.3	56903.1	154.967	154.966	154.967	269.939	268.942	271.006	23	8	8
FT068	mz_158-271s	30943.3	10946	25539.2	5677.18	30625.6	21401	43158	38295.7	42763.1	33626.2	26060.5	11616	20532.7	30500.4	33411.4	29283.5	26245.3	16003.2	22627.4	25709.5	158.003	158.002	158.003	270.936	270.906	271.006	10	6	4
FT069	mz_158.15-83s	29689.1	2465.52	28095.2	2937.58	33772.8	27662.6	29779.9	26620.7	27900.4	29824.4	29270.9	32681.2	26855.8	27264.5	31516.2	26501.9	25083.2	25932.7	33589.1	28018	158.153	158.153	158.154	82.644	82.4427	82.8433	15	8	7
FT070	mz_158.96-5s	59403.3	6637.68	59691.1	4872.4	52911	54451.5	59265.5	53290.8	64381.8	54880.2	70316.5	65729.2	69739.9	56410.9	52629.6	59072	61086.9	58623.4	60667.7	59298.5	158.964	158.948	158.964	4.73771	1.95506	8.30379	19	6	8
FT071	mz_158.96-257s	288141	179785	372146	40645.9	350919	359824	320084	327152	11961.8	455887	9956.37	469347	373255	361219	368266	339574	358966	360265	346539	469086	158.964	158.961	158.964	256.992	253.392	271.006	9	5	4
FT072	mz_159.97-271s	80904.7	7588.52	83602.5	4975.2	75336.8	67325.1	92953	80517.6	86086.3	83903	78782.7	82333.1	75717.4	84038.6	87378.4	86094.2	87898.1	76367	88023.2	83303.2	159.969	159.968	159.969	270.936	270.905	271.006	16	8	8
FT073	mz_160.06-10s	87261.9	13979.8	91982.7	12781.9	67652.8	91584.2	90173.4	113538	77283.7	84481.2	77803.3	95577.9	96676.6	86140.9	85919.7	66915.2	105886	102937	89309.2	102078	160.06	160.06	160.06	9.6408	9.17341	10.043	16	8	8
FT074	mz_160.52-40s	19114	14009.1	15055.1	10988.7	43944.6	10735.1	17623.1	14086.1	35847.1	11986.6	17646.4	1042.96	22196.5	1459.32	24759.9	26245	21269.7	19939.2	3126.6	1444.34	160.519	160.519	160.519	40.0415	39.7915	40.4543	8	3	5
FT075	mz_161.97-269s	14363	2780.81	16893.3	1741.25	12818.6	12641	18604.4	15218.9	11522.5	17907.1	14859.1	11332.6	15871.6	15668.5	17215	14231.5	18620	15937.8	19199.5	18402.6	161.969	161.969	161.97	269.156	268.701	270.674	10	5	5
FT076	mz_165.04-40s	13958.7	9470.96	8284.63	6225.32	28976	8555.79	20897	11152.8	22435.8	5480.2	13369.4	802.773	12956.1	261.756	15270.4	13812.2	10020.9	11131.3	1694.64	1129.76	165.042	165.041	165.042	40.0306	39.6273	40.4543	6	5	1
FT077	mz_166.05-40s	126339	96196	87668.1	61923.2	264663	51350.7	173599	80133.6	257327	66579.8	112033	5026.68	124620	11398.6	156455	143996	127230	103292	19043.7	15309.3	166.05	166.05	166.05	40.0107	39.8631	40.2595	12	7	5
FT078	mz_170.07-7s	13253.4	1969.8	16471.2	6257.78	11128	16004.1	11232.6	14768.6	13953.8	12967.3	10988.5	14984.1	16532.7	7628.08	17583.6	18522.1	27174.2	14269.6	9245.45	20813.8	170.066	170.066	170.066	6.88124	6.63218	7.03108	8	4	4
FT079	mz_172.96-271s	14935.3	2765.49	14939.7	2867.67	17888.6	12166.9	18194.4	12838.7	13407.7	17966.6	15318.7	11700.7	14176.6	20084.8	13284.8	14554.6	13056.3	10969.7	15658.2	17732.4	172.956	172.955	172.957	270.936	270.905	270.936	6	1	5
FT080	mz_180.99-271s	12200.4	2950.96	10322.3	5306.58	13566.6	14642.9	13224.6	16722.1	10238.4	11378.5	10576.5	7253.91	13612.5	1561.18	2017.25	14387.9	12398	13278.8	12803.6	12519.3	180.989	180.989	180.99	270.935	270.612	270.936	9	3	6
FT081	mz_182.99-271s	251672	22153.4	240153	16991.4	242771	227728	291888	275431	251694	238920	230872	254072	239396	260802	246295	258397	242622	208646	239902	225166	182.985	182.984	182.986	270.935	266.326	271.006	19	8	8
FT082	mz_182.98-7s	210272	103415	212051	112650	223398	138213	270243	422828	210403	78503.4	169408	169182	185346	75239.5	183378	425987	225773	321768	134799	144118	182.985	182.985	182.985	7.2756	1.52742	7.47024	13	6	7
FT083	mz_183.99-271s	16572.5	3713.13	15027.9	3049.18	14757.1	14652.7	8950.87	18337.7	19119.2	20792.4	18129.5	17840.4	9567.29	18148.8	19087.4	15109.4	14803.3	16369.8	12358.6	14778.5	183.987	183.986	183.988	270.935	270.586	270.96	8	5	3
FT084	mz_184.99-270s	164481	92351.8	120964	105203	193900	194278	9958.76	224426	227333	227662	215127	23162.5	203749	29972.8	231557	224667	28722.3	215800	22905	10342.4	184.986	184.985	184.986	269.939	268.546	270.936	23	8	8
FT085	mz_185.99-269s	9534.9	2265.4	9628.47	2336.77	6864.37	10881.1	9224.91	12425.4	5662.94	9744.66	10190.8	11285	7484.44	7357.74	8026.82	7265.56	12225.1	10336.8	12484.2	11847	185.988	185.987	185.988	268.544	268.147	269.542	7	4	3
FT086	mz_186.98-271s	32160.3	16916.9	36171.3	27151.7	20810.9	73354	28608.1	26724.8	30521.2	27915.2	23535.3	25812.7	19902	26756.3	81155.8	26175	25610.2	76258.6	6479.76	27032.3	186.981	186.955	186.981	270.905	268.744	271.006	29	8	8
FT087	mz_188.03-40s	24785.6	22332.1	15333.1	12441.2	54850.2	4717	35925.7	13573.7	57414.1	8781.42	22944.6	77.808	24644.2	1003.14	29911.6	27175.7	16038.5	21507.2	936.229	1448.67	188.032	188.031	188.032	39.8154	39.4705	40.0216	7	4	3
FT088	mz_188.98-269s	8781.1	1731.37	9319.96	1967.19	9756.71	8366.46	6740.7	7145.08	10619.5	10597.5	6751.37	10271.5	5883.5	7732.37	8201.34	11139.3	12024.9	9796.94	9856.78	9924.53	188.979	188.978	188.979	269.183	268.545	270.906	7	3	4
FT089	mz_195.99-271s	13343.3	3443.89	11642.5	5733.26	12630.7	10491.8	16674.3	15012.2	10511	17296.2	7967.13	16163.4	9032.14	17806.6	15490	2255.66	15556.7	4395.45	14738	13865.7	195.993	195.992	195.994	270.935	269.541	270.96	11	5	6
FT090	mz_196.06-39s	38236.7	16162.3	33779.9	11453.3	52435.9	33776.3	40557.4	12824	55819.7	20384.5	34203.6	55892.3	21079.9	55195.5	45012.3	27372.3	26833.3	27726.8	38308.7	28710.4	196.06	196.06	196.06	39.2415	38.7948	39.4796	11	6	5
FT091	mz_197.13-21s	33045.9	19905.4	28875	28245.8	58274.5	24388.7	40201.8	58774.1	44032.1	10838.7	12480.6	15376.3	11939.2	13802.7	13317.9	12805.9	30702	2629.61	71965.6	73837.3	197.128	197.078	197.128	21.0908	4.93528	21.4565	7	3	4
FT092	mz_199-8s	19464.4	4720.23	20131.1	6403.51	15877.9	14568.9	23810.4	14140.3	18711.2	25594.9	25070.7	17941.2	29648.7	20220.4	20014.8	25859.9	14078.6	16272.7	24476.9	10476.9	199.004	199.003	199.004	7.68911	7.131	8.0106	12	6	6
FT093	mz_202.18-8s	25963	6292.54	22950.3	3697.68	26235.5	27304.5	27976.3	26519.2	31424.5	16414.2	17256.8	34572.9	17035.7	24595.6	25017.1	26723.4	22793.5	17798.5	26545.6	23092.8	202.18	202.18	202.18	8.44595	8.00863	46.1579	17	8	8
FT094	mz_205.09-136s	28812.4	4727.48	29301.3	1519.37	27945.4	24031.3	21450.9	26466.9	30021.8	33467.1	35134.5	31981.3	28007.3	28629.4	31000.6	28872.1	32200.9	29355.1	28207.7	28137.2	205.085	205.062	205.086	136.444	77.462	136.644	16	7	7
FT095	mz_206.07-10s	208947	35201	214627	29575.4	163628	219051	212752	278552	190118	193471	184014	229991	219652	209672	204554	157210	247445	236783	198163	243541	206.066	206.066	206.066	9.64769	9.17341	9.84564	16	8	8
FT096	mz_207.07-10s	12958.3	2592.89	13526.8	2119.41	10443.2	13330.6	14839.3	16994.7	10753.6	9403.94	13143.7	14757.7	16694.9	13270.1	12256.9	10978.1	14082	13109.6	11416	16406.8	207.069	207.069	207.069	9.64769	9.49267	10.0832	8	3	5
FT097	mz_214.09-81s	44578	1944.46	43311.2	2171.53	42977.3	45418.5	44586.2	43397.4	41845.9	44218.6	47981.5	46198.7	45646.9	46984	42549.6	43082.2	42415.7	44022.3	41365	40424	214.089	214.089	214.09	81.2141	81.0482	81.4522	16	8	8
FT098	mz_215.13-26s	13341.1	3464.83	17158.3	3787.21	14783.9	15649.8	13537	18491.2	13617.1	13844.4	7711.04	9094.35	24566.8	16798.9	16607.3	18793.6	19207.8	12473.6	15165.7	13652.4	215.125	215.125	215.125	26.415	26.1968	26.6392	7	4	3
FT099	mz_216.92-251s	130304	54513.5	159227	62130	136055	83645.5	152795	237221	140443	54918.1	135980	101377	78486.3	153700	153910	149397	274615	190674	186576	86459.4	216.922	216.922	216.923	251.375	219.932	260.577	14	3	5
FT100	mz_217.1-12s	11864.6	4103.75	24113.1	21912.9	12019.6	9798.6	16333.3	15665.5	13912.4	3652.16	13706.9	9828.63	9765.27	40998.8	72480.7	14261.2	13264.7	16728.9	11946.7	13458.8	217.104	216.922	217.107	11.5152	5.11813	38.8203	22	8	7
FT101	mz_218.17-25s	4980.19	5947.66	13528.7	8645.01	48.9686	8236.15	12579.1	14538.7	328.33	2379.32	49.7713	1681.25	1852.78	13592.9	10975.7	22088.9	23557.6	4610.27	23418.2	8133.6	218.175	218.042	218.175	25.4462	25.2397	39.4179	7	4	3
FT102	mz_223.1-78s	8351.66	2325.86	9324.61	6708.62	4272.6	6610.81	10235	7077.48	9924.66	11477.9	8037.59	9177.37	4409.31	6527.32	4969.33	24071	10086	8591.17	3397.07	12545.7	223.095	223.063	223.096	77.6613	77.2619	113.329	11	4	5
FT103	mz_226.95-254s	1.06165e+06	186894	1.03467e+06	171597	1.14459e+06	800247	1.10247e+06	1.21855e+06	1.07235e+06	1.20206e+06	743366	1.20956e+06	969782	1.17692e+06	1.19881e+06	949565	721724	1.17942e+06	921129	1.16001e+06	226.951	226.951	226.952	253.916	214.954	260.773	20	8	8
FT104	mz_226.95-5s	178924	24462	176877	15683.1	152235	155872	159256	166840	179715	203233	196390	217854	213730	171327	160356	173567	175867	175083	174421	170664	226.952	226.952	226.952	4.81594	4.41521	4.93633	16	8	8
FT105	mz_227.12-73s	25209.8	1435.32	23308	2614.97	22918.7	25301.6	26835.2	25287	27166	24624.9	25763.6	23781.4	25461.7	25711.1	26540.6	21411.4	24413.6	22614.1	19199.5	21112	227.125	227.125	227.125	73.0818	72.6784	73.3002	12	7	5
FT106	mz_228.2-83s	20230.7	1763.42	19146.5	4895.03	18782.8	20842.3	23446.1	17817	19881	20142.2	21669.1	19264.7	19871	20611.5	20629.7	20762.5	22303.8	21890.8	7221.45	19881.2	228.195	228.195	228.232	83.2405	83.041	139.034	15	7	8
FT107	mz_228.05-9s	33982.3	13169	31052	10747.6	13790.2	31475.2	29647.6	51689.5	19127.2	41532.2	37217.5	47379	31281.3	31776.8	28702.6	8859.3	37464.1	47238.8	29764.8	33328.2	228.047	228.047	228.048	9.27792	8.78343	9.64922	13	7	6
FT108	mz_229.22-157s	18660.7	3312.44	18826.2	1787.66	18635.2	20041.3	19397.3	15254.6	25309	15758.3	19339.3	15550.8	20019.3	17990.5	17106.6	16098.3	18043.7	21369.8	19824.4	20157.1	229.216	229.215	229.216	156.968	156.57	157.168	13	6	7
FT109	mz_230.17-63s	10491.2	6533.07	7231.73	7055	12727.6	15395	17702.2	2037.79	13180.4	4615.46	2035.32	16236	1755.53	877.767	2864.45	1648.67	18937.2	4970.06	15588.2	11211.9	230.175	230.174	230.247	62.5152	62.117	156.569	9	4	4
FT110	mz_235.17-125s	17331.5	887.649	17048.4	2210.94	17979.9	16207.2	16870.4	16491.4	17468.7	17758.2	16944.2	18932	16585.1	11997.1	18978.4	16673.4	18333.1	18279.3	17316	18225.2	235.169	235.168	235.169	125.478	125.083	125.696	13	7	6
FT111	mz_236.07-81s	32755.5	2531.57	32758.6	3348.89	30084.2	32689.9	33084.1	30054.8	32951.8	31739.2	38135.8	33304.1	35739.7	34081.3	36975	32990	27121.3	34867	30440.8	29853.4	236.071	236.071	236.072	81.1162	81.0482	81.6515	16	8	8
FT112	mz_239.24-175s	66492.3	1918.82	67358.2	4424.58	67480.3	66037.2	69932	65577.8	66516.1	63198.2	65874.4	67322.3	68847.2	68050.1	64003.7	76293.7	67309.3	66370.3	67130.7	60860.8	239.237	239.236	239.237	174.9	174.701	174.921	16	8	8
FT113	mz_239.09-39s	23332	12904.4	23497.9	10491.5	18560	10831.6	30424.3	6665.16	47804.3	29900.5	19271.5	23198.6	11537.2	10275.2	32960.5	32781.6	25507.3	20800.4	38019.1	16102.2	239.089	239.088	239.149	38.5999	13.9356	38.841	11	4	7
FT114	mz_240.24-175s	10033	1305.53	8738.01	2530.99	12237.2	10393.8	10482.1	10255.7	10730.7	8814.29	9393.31	7957.08	3670.2	9240.55	9698.82	10514.2	9301.6	10611.3	10759.2	6108.19	240.24	240.24	240.241	174.9	174.501	174.977	7	5	2
FT115	mz_243.18-21s	31948.6	10948.3	36823.2	8065.68	31980.8	7987.29	38714.6	34934.7	40675	25143	35562.1	40591	28051.3	45502.3	40201	43392.3	47299.1	30400.3	29219.4	30519.7	243.182	243.087	243.182	20.5017	18.7866	44.7815	9	5	3
FT116	mz_244.19-72s	6866.4	2765.79	7775.26	5009.6	10342.2	6790.09	10679.2	2640.82	6698.5	5319.47	4522.09	7938.8	4837.68	3865.57	6957.69	4169.71	9877.31	6260.29	19212.3	7021.47	244.191	244.19	244.263	71.8889	58.3237	101.574	5	4	1
FT117	mz_245.08-90s	13482.5	2076.71	19335.9	12493.6	10130.1	14057.9	15355.5	11825.1	12415.8	12765.5	14857.1	16452.9	15616.4	12090.9	16337.4	16156.4	20270.1	12188.6	12541.1	49486.7	245.078	245.077	245.185	89.817	38.2585	90.4141	19	8	5
FT118	mz_246.86-271s	16727	9234.5	17713	6905.32	24132.9	21190	2473	20216	23052.4	20682.1	20687.7	1381.78	19626.3	21031.6	936.892	21927	21381.3	17999.4	19984	18817.2	246.862	246.861	246.863	270.936	269.724	271.006	17	8	8
FT119	mz_249.18-182s	20257.7	2460.02	20424.2	2338.3	22760.4	18535.3	20924.7	15868.4	20846.3	21076.7	18655.8	23394.2	22944.4	22304.7	22420	22165.2	18134.9	17867.6	17333.2	20224.1	249.184	249.184	249.184	181.874	181.674	181.877	7	2	5
FT120	mz_250.18-83s	12272.7	1415.06	11207.8	1249.52	12936.8	13973.6	13020.5	9488.89	11960.9	13207.7	11107.8	12485.5	11308.7	13160.8	9297.69	11823.1	10248.8	10589.9	12465.8	10767.8	250.177	250.177	250.178	83.214	83.041	83.4399	12	7	5
FT122	mz_255.23-161s	17066.8	14703.3	14793.8	7902.88	42353	21606.2	11769.5	3772.77	35755.3	6593.26	6877.33	7807	8626.04	28489.7	10751	25510.5	10755.6	10922.9	7820.72	15473.7	255.231	255.231	255.232	161.149	160.947	161.949	10	4	6
FT123	mz_256.26-160s	168353	41455.8	174989	35310.9	114129	131179	145080	162147	174434	202698	245150	172010	173020	233005	174664	163205	216100	119974	165046	154899	256.264	256.263	256.264	159.557	159.34	159.558	16	8	8
FT124	mz_257.15-143s	15460.7	1571.37	14406.5	1569.38	16301.8	13774.4	15416.3	12717.5	17047.2	16440.8	14954.2	17033	13598.7	15788.4	15518.8	13824.2	11647.6	14182.9	16701.5	13990	257.151	257.15	257.151	142.821	142.422	143.02	7	4	3
FT125	mz_257.25-175s	125508	7342.64	129531	8619.79	135642	128502	133792	112596	122196	121434	123903	125996	120559	130581	127207	148940	130509	128179	127874	122399	257.248	257.247	257.267	174.701	159.14	174.921	27	8	8
FT126	mz_258.25-175s	20585.4	1171.13	19496.8	2123.4	19839.1	22349.8	20460.3	20924.8	19457.9	20614.1	22021.9	19015.6	17536.9	19764.2	16341.9	23290.4	19401.5	20387.2	18515.2	20737.2	258.25	258.25	258.251	174.722	174.502	174.904	13	8	5
FT127	mz_264.87-271s	5709.93	1994.86	5619.69	1128.89	7375.36	4336.86	8158.89	4128.53	4559.71	7034.51	7359.19	2726.41	3843.93	4558.5	5158.16	5479.86	5952.42	6347.28	6122.72	7494.69	264.872	264.872	264.873	270.935	270.016	270.936	6	4	2
FT128	mz_265.25-164s	14373.1	2687.15	9876.73	3829.98	13215.9	13156.9	11098.3	13950.2	16661.7	14874.1	19616	12411.6	9227.57	11199.3	4624.04	8993.3	13072.9	4717.1	15555.6	11624	265.252	265.179	265.253	164.34	163.742	182.073	10	5	4
FT129	mz_265.96-254s	217076	61955	226109	11931.2	243130	108099	248216	265153	249639	239758	255062	127547	240725	232421	206759	240088	213814	221988	225005	228068	265.962	265.961	265.963	253.838	221.125	260.425	16	6	4
FT130	mz_270.98-5s	9574.05	924.597	9008.62	936.198	8055.46	9068.3	9045.56	9489.4	10263.9	9751.3	11187.7	9730.72	9910.8	8286.63	9252.37	8453	9636.57	9797.92	7228.23	9503.42	270.977	270.977	270.978	4.73522	4.70814	4.92778	10	7	3
FT131	mz_273.17-42s	18865.4	5296.06	22314.1	6282.7	16082	19092.9	16880.7	31091	16777.9	20630.3	14655.3	15713	16892.5	21904.8	18761.3	32927.5	25740.9	12984	27076.1	22225.6	273.167	273.13	273.184	42.1972	33.4055	68.4934	21	7	7
FT132	mz_277.22-121s	16226.7	10773	7705.49	5774.83	21064.9	22291	24012.3	1135.91	32958.3	5613.6	7898.14	14839.4	879.303	12120.2	14373.2	1194.28	9027.4	8699.55	1439.53	13910.5	277.216	277.213	277.216	120.503	119.299	160.753	8	5	2
FT133	mz_278.24-159s	13070.5	3164.17	13189.8	2951.64	9769.68	10462.1	11941.3	13878.5	10473.1	15156.5	19325.2	13557.7	13875.1	18083.6	15741.6	11977.9	14336.9	8986.3	10223.8	12293.7	278.245	278.244	278.248	159.359	109.949	159.558	8	5	2
FT134	mz_279.16-136s	29161.5	3504.19	27277.7	2758.1	25613.3	25481	29207.6	28030.5	30187.8	29667.5	36689.5	28414.7	26319.3	28160.3	22883.6	28070.4	27092.2	24712	29018.9	31964.5	279.159	279.158	279.232	136.245	82.6447	137.839	23	8	8
FT135	mz_280.26-154s	85324.7	21977.9	62952.7	14045.9	53818.4	64206.9	93994.1	60830.5	97887.1	109497	104534	97830.3	45577.2	58684	68290	58646.2	85566.2	44655.2	75277.9	66924.7	280.263	280.263	280.264	153.581	116.911	153.978	18	8	7
FT136	mz_281.27-146s	7504.14	7881.29	4261	5720.18	48.6519	8792.32	5336.87	22800	681.937	15023	5478.04	1872.29	5191.94	543.077	952.448	0	14571	496.249	803.886	11529.4	281.266	281.171	281.267	146.006	120.016	154.177	11	5	3
FT137	mz_282.28-164s	1.1857e+06	224307	1.08172e+06	188337	964905	955205	1.12601e+06	986666	1.50714e+06	1.32831e+06	1.47182e+06	1.14552e+06	1.15866e+06	1.11312e+06	1.24053e+06	905173	1.26152e+06	699456	1.14972e+06	1.12561e+06	282.28	282.279	282.28	164.141	163.941	164.34	16	8	8
FT138	mz_283.12-86s	35675.3	4516.27	32682.9	5665.83	29535.3	31257.8	34728.3	38298	38260.6	43867.6	35774.5	33680.4	22766.2	35144	38797.2	31848.2	38554.9	32668.6	35368.1	26315.8	283.117	283.117	283.118	86.4317	86.2304	86.6301	11	6	5
FT139	mz_283.28-164s	208998	33207.9	163964	67256.3	178898	171973	205957	183631	262346	222758	249195	197225	205429	190866	12347.7	161259	215816	129560	196319	200114	283.282	283.262	283.283	164.141	142.622	177.091	21	8	7
FT140	mz_284.29-177s	110310	21113.8	101103	22755.7	98491.6	102310	109557	105092	102780	130585	151009	82653.5	128420	126155	97345.1	103144	115885	59643.9	87126.2	91104.2	284.295	284.264	284.296	177.292	142.417	177.494	22	8	8
FT141	mz_285.3-177s	20640.4	3896.83	19676	3858.14	18205.2	19124.1	22185.6	20982.3	19940.2	25080.5	25883.7	13721.8	25373.9	23697.9	20179.2	19097.7	21500.1	13606.1	16642.3	17311.1	285.297	285.277	285.299	177.49	176.893	189.446	21	6	8
FT142	mz_285.89-271s	12818.7	1400.71	12415.3	2352.49	14409.3	13461.3	13249.1	13027	9779.29	12355.1	13808.8	12459.9	7099.89	13566.6	13091.6	14568.6	14121.2	12570.5	12856.7	11447.1	285.893	285.893	285.894	270.935	269.741	270.96	12	6	6
FT144	mz_286.89-271s	9404.93	2677.07	8349.86	3301.02	12903.2	11249.2	9219.53	7300.12	10962.9	11446.8	5260.17	6897.47	8898.9	8585.03	8503.24	10796.6	11616.8	9023.55	8684.64	690.132	286.892	286.891	286.892	270.621	269.343	270.936	8	4	3
FT149	mz_289.18-110s	28197	26433.9	6973.17	5656.68	61667.5	56141.5	52726.4	37314.2	1323.62	5623.04	1317.85	9461.62	10937.2	9606.78	9052.62	9851.62	14869.3	509.655	120.404	837.88	289.178	289.153	289.293	109.696	75.8668	124.687	12	6	5
FT150	mz_289.89-269s	19240.8	2185.62	17126	2789.43	20856.6	18490.2	20291.6	19374.6	20427.9	20306.2	14144.9	20034.2	18203.7	18829.9	14513.1	11990.8	17723.5	19517.2	15973.3	20256.7	289.889	289.888	289.89	269.141	268.544	270.906	13	6	6
FT151	mz_295.12-68s	26218.4	9953.94	31798.6	12827.3	18808.8	17456.2	23578.2	38398	29322.1	41843	26481.2	13859.3	29541	46288.7	26302	39578	39174.3	37223.7	4192.95	32088	295.115	295.114	295.175	68.4947	38.3978	68.892	10	4	5
FT152	mz_296.97-40s	6830.17	4636.83	4727.08	3387.67	13434.8	3080.56	8426.5	5778.24	12724.1	3645.29	7355.56	196.322	8095.19	748.932	6930.25	7245.34	6822.8	6712.99	817.605	443.542	296.972	296.972	296.973	40.0604	39.9911	40.4543	6	4	2
FT153	mz_297.24-150s	12267.9	1289.61	11662.6	3753.74	14793	12783.8	12920.7	11182	11111.6	10885.6	12501.2	11965.1	6493.15	9964.04	15707.2	13553.4	11739.8	8034.24	17500.9	10308.2	297.24	297.24	297.262	150.088	125.722	150.393	6	2	4
FT154	mz_300.2-38s	47985.3	9634.29	44221.3	10356.4	37871.4	49473.3	58302.8	55142.9	51255.7	29186	52077.8	50572.5	25330.1	50396.6	46622.4	44643.1	60809.1	45621.7	44643.5	35704	300.198	300.155	300.201	37.6899	18.1038	77.6615	13	6	5
FT155	mz_301.14-136s	153192	12497.7	152633	4560.05	140839	140458	143154	147171	162114	158440	175915	157446	151169	152950	159064	149573	149083	149343	149534	160351	301.141	301.14	301.211	136.445	82.4456	175.1	28	8	8
FT156	mz_302.14-136s	24080	1809.2	24422.4	1810.73	21337	22453.5	23503	23218.2	24226.8	26418.1	26314.4	25169.3	27089.3	24853.9	24265.6	21180.3	24687.2	25172.2	22611.3	25519.7	302.144	302.143	302.145	136.246	136.245	136.843	16	8	8
FT157	mz_302.2-12s	10991	5038.62	12458.6	3027.14	15470.7	15220.4	10675.3	5759.51	16477.9	5318.08	4729.5	14276.8	8894.31	12435.5	16248.5	12705.5	12044.1	8151.94	16736.1	12453.3	302.196	302.195	302.196	11.9056	11.316	12.1645	12	4	8
FT158	mz_302.24-154s	16908	8226.86	12443	3893.33	11726.7	14430.1	23169.5	6853.13	5646.36	25531.9	23868.6	24037.5	5669.8	11734.9	13524.3	13034	19039.9	9446.84	12267.8	14826.9	302.245	302.244	302.269	153.58	95.1969	153.78	9	6	3
FT159	mz_304.26-164s	143748	21387.8	127644	19293.9	120759	120807	140227	127515	170625	157686	174148	138216	138982	134166	147481	112624	125008	87635.7	139707	135548	304.261	304.26	304.284	164.141	106.156	164.34	16	8	7
FT161	mz_305.26-164s	25184	4961.45	25127.3	3814.43	19041	23496	23833	23741.4	32773.2	26222.3	31977.1	20388.3	26932.8	23839.5	28646.3	22910.4	28958.4	17687.9	28023.2	24020.2	305.264	305.263	305.265	164.141	163.749	164.34	13	6	7
FT162	mz_305.9-271s	27191.9	2348.26	28934	2088.98	25705.3	23488.3	29573.9	29546.8	25131.5	29776.8	26644.5	27668.3	26499.9	30303.5	31287.8	30337.6	28987.9	26845.8	30912.8	26296.5	305.899	305.898	305.9	270.935	270.586	270.96	16	8	8
FT163	mz_307.19-76s	15813.2	8457.92	17675.8	15039.6	22815.2	26865	10330.7	956.949	13687.8	17720.8	11253.7	22875.4	866.656	27494.9	13302.1	4351.82	20898.9	34055.2	1296.14	39140.9	307.19	307.001	307.19	75.8675	39.8233	77.2629	11	6	4
FT164	mz_309.21-55s	20487.3	13704.2	31313.1	13559.3	11881.4	25693	14017.9	45477.1	17093	31092.8	18643.1	0	17222.7	28888.7	12414.3	53134.4	35947.8	27568.5	45820.9	29507.3	309.206	309.19	309.227	54.9419	47.3715	94.4031	31	7	8
FT166	mz_310.23-55s	2963.64	2095.62	5110.95	2479.03	1383.06	2493.71	1491.09	7528.96	2404.62	4556.22	1991.24	1860.25	2162.21	5930.74	981.214	8206.75	5512.49	6866.63	6891.23	4336.32	310.23	310.114	310.231	55.1373	8.97874	55.3303	6	1	5
FT168	mz_311.31-180s	37354.9	9677.8	31033.6	6466.18	38198.7	35270.4	42596.2	17013.3	47906.3	41594.3	44407.1	31852.9	27559.9	34142.9	40611	27039	39267.5	23252	25129.5	31266.9	311.313	311.255	311.314	179.543	156.756	179.711	18	7	5
FT169	mz_312.33-192s	14286.4	4258.32	13885.6	4163.79	16025.9	13100.4	13426.8	5391.57	15425.1	14347.1	20447.2	16126.9	14225.8	16649.1	12491.8	16695	18716.3	9461.23	6486.71	16359	312.325	312.324	312.326	192.037	191.837	192.436	5	1	4
FT170	mz_317.11-136s	10240.5	2492.74	9174.8	1500.13	8389.92	8550.51	6270.59	9881.46	11255.6	11004.6	14049.8	12521.3	10059.4	10484.9	9220.14	10509.2	6985.66	7949.44	7487.88	10701.7	317.114	317.114	317.114	136.444	136.444	136.842	7	3	4
FT171	mz_320.23-164s	13257.3	3829.89	13067.5	1180.33	14253.9	4865.33	16863.1	15430.3	11217.4	13818.4	16265.8	13344.1	11836.3	13725.8	14883.3	12025.4	13462.2	11501.4	13140.4	13965.4	320.234	320.234	320.235	164.34	163.95	164.545	8	4	4
FT172	mz_323.15-100s	17130.3	18080.2	20634.1	8873.51	3865.35	2744.04	3369.61	25110.8	10006.6	51445.9	34471.7	6028.46	17859.2	25766.5	12687.1	25848.7	33331.8	24976.3	4958.6	19644.9	323.146	323.145	323.147	100.179	99.979	100.777	7	2	5
FT173	mz_323.21-55s	5687.15	3890.16	9858.56	6689.36	3283.11	5832.1	5067.43	9206.39	3915.26	13531.1	2041.04	2620.8	7205.14	4872.81	4063.26	24471.1	7824.74	5712.51	11919.9	12798.9	323.206	323.205	323.206	55.4199	55.1426	55.5406	6	2	4
FT174	mz_327.01-97s	19105.5	2176.23	19846.9	1458.69	19879.1	15808.8	19272.7	17938.7	21543.4	21240.7	20730.1	16430.8	20863.1	21284.2	20753.6	20968.4	20246.3	18891	17198.9	18569.9	327.008	327.007	327.009	97.1893	96.7911	97.1978	15	7	8
FT175	mz_328.91-271s	14800.1	902.153	14300.8	1161.84	15318.4	14545.7	13644.2	15196.7	15908.2	15349	13306.5	15132	13700.1	14688.4	12210.5	13669	15638	15052.7	15577.7	13870.3	328.915	328.914	328.915	270.821	269.66	270.936	12	7	5
FT177	mz_331.18-51s	25701.1	12332.4	42096.8	18611.7	22718	18540.4	14090.6	45849.8	15305.1	42655.8	17939.4	28510	28142.1	35862.9	18036.9	50503.5	57518.2	46017.2	74349.9	26343.8	331.181	331.136	331.209	51.454	40.6229	94.2031	32	8	8
FT178	mz_332.29-180s	14438.1	3463.03	11738.3	2413.88	12550.3	13536.8	17864.6	8071.77	16508.2	16027.5	18501.7	12443.8	12314.1	11344.8	15620.9	11014.2	13767.8	7382.79	10489.7	11972.3	332.292	332.291	332.292	179.599	179.284	179.711	7	4	3
FT179	mz_337.1-112s	34781.6	2690.75	35503.5	2916.54	33091.8	30047.3	34371	32727.5	37463.4	36378.1	36513.9	37659.7	39280.9	34207.8	36934.5	38434.6	37769.6	32768.7	32417.1	32214.7	337.104	337.074	337.105	111.537	111.137	113.728	16	7	8
FT180	mz_338.11-112s	5747.9	1410.45	6293.96	1014.13	6933.56	4382.19	4848.47	6001.01	6040.02	3396.04	7182.46	7199.49	4698.62	5498.89	5213.32	6804.46	6872.52	6624.15	7469.68	7170.03	338.108	338.107	338.108	111.635	111.535	111.736	6	2	4
FT181	mz_338.34-193s	185274	86015.4	146150	26933.9	242975	140204	378675	126860	148080	156226	138447	150724	161815	144062	193942	145045	150330	112961	108894	152152	338.342	338.341	338.343	193.232	193.017	193.262	16	8	8
FT182	mz_339.34-193s	41891	17852.7	32382.6	6724.26	51700.4	35560.9	82844.5	31613.8	31848.9	35059.1	30503.8	35996.2	37602.8	33785.4	42764.8	32393.3	34307	22635.1	23396.9	32175.2	339.344	339.249	339.346	193.033	117.713	193.262	27	8	8
FT183	mz_341.27-151s	12638.8	1520.02	12948.3	3266.48	11396.1	15166.3	11850.5	14137	11052.5	11136.3	13153.5	13218.6	8004.35	14075.3	19543.4	10841.4	12395.7	13593.7	12685.7	12447.2	341.266	341.265	341.266	150.59	150.381	151.189	5	4	1
FT184	mz_343.3-92s	14570.9	12867.8	16391.4	17784.3	43599.5	8885.99	21804.3	6431.87	6187.35	13317.3	10592	5749.14	2233.81	26758.9	56170.6	4746.03	14986.5	7230.81	11404.7	7599.82	343.295	343.295	343.296	92.2093	91.8086	92.4077	7	2	5
FT185	mz_345.19-56s	10474.7	5278.95	23438	16984.2	7382.02	11954	9522.78	17734.2	5471.57	18917.3	6003.3	6812.85	13601.2	9319.44	59113.1	37529.4	15093.9	10354.9	20388.8	22103.6	345.188	345.188	345.225	55.5135	54.9436	84.8364	12	6	6
FT186	mz_348.99-97s	18675.6	558.72	18415.6	1649.59	19005	18947.8	18173.8	18416.3	19098.2	17744.9	19465.4	18553.1	20025.7	17891.1	19366.7	20870.4	17309.5	15619.3	18250.4	17991.5	348.99	348.989	348.99	97.1898	96.99	97.3913	13	8	5
FT187	mz_350.99-97s	17698.6	1428.49	17907.4	1359.81	18716.9	15420.5	16350.9	18648.9	19819.9	18177.9	17512.3	16941.3	16733.2	18028.1	19789.7	20014.7	17827.3	16895.5	16338.8	17631.9	350.987	350.986	350.988	96.9977	96.7921	97.3898	13	5	8
FT188	mz_356.28-182s	15423.5	3769.81	15012.6	1093.07	15108.1	18071.8	15865	6773.41	15033.4	16881.2	16502.2	19152.8	16939.9	14298.4	16423	14660.1	14345.7	14696.8	14939.2	13797.8	356.28	356.279	356.286	181.675	158.162	182.074	9	6	3
FT189	mz_362.93-5s	32419.4	4058.99	32147.2	3269.8	27537.1	28417.3	29831.2	29556.3	33800.4	38008	36494	35711.2	39865.4	30778.7	29958.6	31483.9	31694.8	30509.2	32908.3	29978.9	362.926	362.926	362.927	4.739	4.41521	4.93528	13	6	7
FT190	mz_365.14-131s	23004.8	5134.6	20860.3	1333.32	32482.7	29006.2	19644.7	17299.8	20243.3	20589.7	21820.3	22951.4	19319.3	18721.1	21375.8	22620.4	22076.6	21258.7	21239.4	20270.8	365.136	365.135	365.302	131.462	84.7934	177.889	19	8	8
FT191	mz_367.23-60s	31671.8	17264.1	51580.3	23048.6	15948.4	39842	20880.3	66196.8	23899.7	42929.2	15379.8	28298.6	37186.1	38639	28705.5	94548.8	71336.3	46357.4	64218	31651.1	367.232	367.232	367.233	59.9257	59.7251	60.1363	16	8	8
FT192	mz_367.27-67s	33678.8	33937.6	61108.1	40075	9871.42	14217.4	8156.69	101254	15309.1	69385.8	34467.1	16769.1	23973	51699.9	9761.38	139353	84880.7	62193.6	73266.2	43737.7	367.269	367.268	367.269	67.2989	67.0992	67.5299	13	7	6
FT193	mz_368.25-64s	5252.82	7161.76	9848.41	9969.26	0	0	0	19295.8	4758.89	12402.7	0	5565.19	56.5608	10185.1	0	28397.2	17368.8	11815.2	10964.4	0	368.254	368.235	368.272	63.7118	59.7252	67.5254	14	4	5
FT194	mz_375.2-51s	6198.72	4202.05	10036.6	5145.89	4227.91	6431.59	3733.13	15272.5	6723.13	8165.27	2434.9	2601.36	5538.09	9478.51	3176.87	19602.4	13017.8	8213.58	13214.8	8051.15	375.198	375.162	375.235	51.3434	44.3816	58.3257	12	3	6
FT195	mz_377.21-182s	5448.12	1443.58	6415.13	1046.06	4745.51	3673.78	3502.93	4736.86	6749.17	6847.1	6514.23	6815.37	6848.37	4956.42	6138.95	7252.19	5149.34	6841.12	8050.38	6084.29	377.208	377.207	377.228	181.883	128.274	182.075	10	3	6
FT196	mz_381.25-67s	8900.72	4830.12	13874.3	7605.67	16179.5	9301.78	5382.81	11694.5	4826.54	14776.3	5033.62	4010.71	9419.46	8950.68	6484.4	30112.1	11556.9	10416.9	18663.7	15390.1	381.248	381.135	381.248	66.9124	65.5366	67.5299	8	3	5
FT197	mz_384.26-64s	7696.34	7980.97	16230.5	8021.64	13312.5	12987.5	208.624	19787.9	769.609	13453.3	298.151	753.182	13007.8	10406.9	8626.49	31676.8	23176.7	12213.4	20049.9	10685.9	384.259	384.25	384.296	63.5163	59.7258	100.058	20	4	8
FT198	mz_385.29-151s	13816.4	2197.78	12623.9	1552.34	14798.7	15461.1	17067.8	13859.5	13882.6	10194.1	13983.9	11283.7	11584.6	14603.4	13408.8	11772.2	11989	11212.3	11281	15139.6	385.292	385.292	385.293	150.591	150.168	150.791	9	5	4
FT199	mz_387.18-93s	37624.1	9601.82	26750.9	8041.07	29524.7	33043.8	38647.2	31012.6	37204.8	59522.4	32200.2	39837.5	35989	27276.2	26099	15200.5	37875.9	19113.9	21200.5	31252	387.18	387.179	387.193	93.404	93.006	103.97	23	8	7
FT201	mz_389.21-60s	49579	25893.5	77326.2	35325.4	27655.3	65661	37643.9	101704	37427	61795	22236	42509.2	53206.9	55396.2	43213.9	141057	108505	68071.1	100794	48365	389.214	389.177	389.215	59.9242	53.138	60.1363	29	8	8
FT202	mz_389.25-67s	27429.9	26981.3	54897.7	27175.7	5799.86	12429.9	8917.66	80727	11999.6	56053.3	28755.9	14755.6	18830.5	44948.3	43760	110567	68198	51122.8	63590.1	38164.8	389.251	389.25	389.251	67.4001	67.298	87.0283	14	6	8
FT203	mz_390.22-60s	9153.32	5248.9	13367.7	6632.84	4709.42	11565.5	6971.36	19598.4	5619.23	13021.8	4384.12	7356.67	9818.24	10009.2	8438.47	26872.6	17055	9816.24	17444.4	7487.68	390.218	390.181	390.254	60.2247	53.5359	86.6291	18	6	6
FT204	mz_391.28-192s	16409.1	2752.24	18152.1	2836.17	19822.3	15231.1	19606.9	16819.6	15740.5	18332.7	13212.3	12507.3	20559.3	18500.8	23417.6	15161.6	18157	18299.6	15195.8	15924.8	391.284	391.283	391.285	191.638	191.438	192.037	10	4	6
FT205	mz_393.3-192s	11557.7	2074.21	13982	2916.56	15411	13312.7	10315.4	10879.1	11902.7	8705.69	10181.8	11753.3	19537.5	13114.3	14589.9	11861	15344.3	15476.5	10342.1	11590.1	393.297	393.296	393.297	192.435	192.236	192.638	6	2	4
FT206	mz_397.33-183s	21762.9	16475.4	15632.4	11257	53574.4	34069.8	15948.4	2225.73	26849.2	10378.2	22158.9	8898.83	2190.53	31783	9270.25	10790.6	23921.4	17148.9	2532.7	27421.7	397.328	397.328	397.329	182.873	182.472	183.07	11	6	5
FT207	mz_399.31-158s	28672.5	1767.34	29209.8	2823.39	31578.6	25911.7	28652.1	27912.3	27871.9	30758.6	28432	28262.5	28410.1	33916.3	29602.3	32705.4	29002.7	27522.7	25849.2	26669.4	399.307	399.307	399.308	158.262	157.953	158.363	10	6	4
FT208	mz_403.23-67s	7315.04	3544.93	13550.4	9836.18	7921.7	7282.45	10558.4	14049.4	3289.27	5549.75	5666.22	4203.09	10866.6	5038.76	6026.56	36115	10419.6	9725.88	13972.2	16238.5	403.229	403.133	403.23	67.497	66.9001	103.766	9	5	3
FT209	mz_406.33-175s	14307.5	1368.59	12658.7	1687.57	15277.7	15103.9	14889.8	14117.6	14870.1	15363.4	13558	11279.7	9749.5	12838.3	14056.1	15134.5	11144	12914	12012.8	13420.6	406.329	406.328	406.33	175.299	175.183	175.52	9	6	3
FT210	mz_409.16-93s	48409.2	10392	42486.2	5284.38	36799.7	43807	49284.1	40093.8	51158.3	70810.5	44531.3	50789	47036.6	37688	38827.7	34663.3	46864	48634.6	46207.6	39967.7	409.162	409.161	409.175	93.4735	92.9553	103.97	18	8	7
FT211	mz_410.17-93s	10890.7	2935.45	9623.58	1663.37	8072.14	8581.6	9219.64	9509.13	11524.9	17131	10508.3	12579.1	10110.8	7933.85	8626.56	8541.16	11820	10102.7	12032.9	7820.64	410.165	410.164	410.165	93.4048	93.0084	93.6034	6	4	2
FT212	mz_412.28-120s	12330.9	14037.2	8236.32	8850.34	39257.9	22913.7	1487.02	43.2646	19068.6	3223.62	275.914	12376.8	197.548	25480.1	978.76	1546.1	16870.4	8267.63	4450.54	8099.47	412.282	412.281	412.282	119.802	119.312	120.294	6	4	2
FT213	mz_413.27-192s	80945.8	18609.3	94119.5	13097.4	97724.9	83466.8	97170.9	38854.2	86111.4	88433.2	77771.2	78033.5	103614	91986.3	118233	81312.8	97722.1	97534.9	79528.9	83024.3	413.266	413.265	413.323	192.036	120.095	192.267	19	7	8
FT214	mz_414.27-192s	21874.8	1786.93	22724.4	3532.46	24220.2	22730.6	23407.1	21928	21731	22396.2	19557.7	19027.7	25527.1	21511.7	28899.2	18407.2	23155.2	24675.5	19442.2	20176.9	414.269	414.268	414.27	191.937	191.638	192.267	10	4	6
FT215	mz_415.21-106s	13187	1216.38	12624.4	2093.62	12390.3	12350.9	12633.4	13901.7	11250.2	13992.3	14945.6	14031.6	13928.6	15659	12940.9	12498.6	14325.7	10492.2	9193.63	11956.5	415.211	415.21	415.212	106.272	105.956	106.369	8	5	3
FT216	mz_416.23-31s	6590.3	1405.06	8153.56	7798.89	8658.73	7151.68	5936.26	7095.96	8213.18	4794.42	5338.41	5533.79	4274.73	7419.92	2084.5	2741.07	5344.44	5010.82	12724.1	25629	416.228	416.227	416.231	31.3711	30.973	64.3387	6	4	2
FT217	mz_419.19-48s	4612.44	2882.2	8567.46	5970.03	2921.68	7555.2	2084.42	5714.05	2091.8	9735.61	2079.59	4717.19	1702.48	5549.65	1361.83	14896.8	12828.8	6938.48	17501	7760.65	419.189	419.188	419.226	48.0656	47.582	54.7437	6	0	4
FT218	mz_419.32-202s	16469.6	1541.88	16282.7	3247.83	16947.8	16348.5	18073.9	18354.9	17669.2	14792.8	15199.6	14370.4	19119.9	17332.3	18356.9	16742.9	15047.1	16800.6	18019.6	8842.19	419.315	419.314	419.316	201.63	200.804	202.399	10	4	6
FT219	mz_422.74-72s	21904.4	22680.7	23016.9	31649.5	70294.4	19114.5	30118	24649	24556.6	2886.2	2013.31	1603.16	1668.4	1194.68	3706.81	6557.16	9971.06	15857.7	60347.7	84831.5	422.737	422.736	422.737	71.5862	69.7206	78.8703	10	5	4
FT220	mz_425.29-168s	7965.53	822.064	7215.29	1562.55	8126.18	7202.75	8888.96	7661.92	9451.27	7236.47	7314.53	7842.14	8234.13	8151.09	7664.08	7314.53	7007.65	8063.59	7795.71	3491.54	425.287	425.286	425.359	167.528	167.13	200.818	8	3	5
FT221	mz_425.27-71s	25293.4	15915.3	48161.6	25972.7	13121.3	26181.6	13745.7	57035.4	18198.4	41222	13125.3	19717.8	29968.6	40605	22700.3	90095.5	84813	46025.2	46963.6	24121.6	425.275	425.274	425.312	71.2854	70.6864	78.6654	31	8	8
FT222	mz_426.31-78s	18075.9	15686.2	30884.1	27943.7	13485.6	1381.74	1754.78	44998.9	25731.9	34253.3	15008.8	7992.15	5934.28	24141.9	1684.43	84597.9	56431	37741.9	22871.2	13670.1	426.314	426.277	426.315	78.4593	70.8847	128.472	16	6	6
FT223	mz_427.3-75s	1219.97	2557.3	3572.77	4610.27	58.827	0	2354.42	7220.15	65.0954	0	0	61.2781	0	0	0	12986.4	4118.48	6504.5	4790.61	182.2	427.298	427.251	427.317	74.5718	49.5487	78.4588	6	2	4
FT224	mz_430.91-5s	41016	5903.45	40962.5	3604.3	31916.9	36522.7	37281.5	39557.8	41817.8	48969.3	43717.7	48344.2	48727	39692.3	36406	41849.7	42009.9	38898.2	39561.3	40555.9	430.914	430.914	430.914	4.73771	4.41521	4.92922	11	5	6
FT225	mz_433.2-56s	11305.2	7438.43	13504.6	5484.42	6983.4	17889.8	6313.74	24428.4	9654.61	15027.4	957.32	9187.19	15419.9	9031.4	5524.97	20616.8	21093.5	9926.58	12199.2	14224.5	433.205	433.204	433.241	56.3374	55.9375	62.9154	15	4	7
FT226	mz_437.19-106s	17788.9	2533.88	18104.4	1757.39	17128.2	16829.9	21539.9	17295.9	13339.5	20139	19406.6	16632.6	20413.2	18060.3	20221.1	18208.4	18615.6	14977.1	17109.5	17230.4	437.193	437.192	437.193	106.356	105.792	106.555	9	4	5
FT227	mz_440.31-141s	9685.73	9960.12	19487.9	21964.3	27308.6	12506.6	2259.45	0	21230.1	7470.63	1279.66	5430.93	135.484	62886.9	3582.07	4313.19	21238.7	27455	1329.23	34962.5	440.313	440.313	440.314	141.423	141.022	142.622	5	1	4
FT228	mz_441.3-202s	100952	2513.95	99256.8	5982.68	102937	101050	104471	100848	96103.1	101794	101340	99074.4	106423	93935	103411	90483.4	107079	99040.8	95474.5	98207.9	441.297	441.296	441.298	201.605	201.402	201.807	16	8	8
FT229	mz_442.3-71s	17797.7	16755.9	23559.3	10424.4	6337.41	11399.4	4880.83	29289.8	4997.34	53508.2	20907.4	11061.3	16469.2	20482.6	12009.2	40014.5	39228.2	20433.3	22655.3	17182.5	442.301	442.263	442.338	70.9365	64.3097	78.658	25	6	8
FT230	mz_442.3-202s	25192.8	2542.67	25236	5960.78	27005.7	22911.2	26448.8	20230.1	27890.3	26476	24391.3	26189.2	28372.9	22922	24977.3	11662.2	30022.4	29459.2	27716.2	26756.1	442.3	442.299	442.301	201.801	201.068	202.597	14	6	8
FT231	mz_443.33-158s	27532.8	3006.73	26210.5	1701.7	26104.5	29906.9	31263.9	23709	26366.2	31465.3	27081.2	24365.1	27624.3	25820.4	28699.8	26292.6	26290.9	23243	24662.1	27050.8	443.334	443.333	443.334	158.163	157.953	158.362	10	6	4
FT232	mz_443.34-78s	4161.86	5575.72	9968.84	8699.44	463.589	873.91	437.787	15829.8	759.196	8580.14	5420	930.506	2985.44	7595.72	2627.09	27572.3	17476	11591.6	6009.17	3893.48	443.34	443.304	443.341	78.4584	70.4741	78.6563	8	2	5
FT233	mz_447.22-65s	17438.6	9570.05	23452.9	10961.3	15057.1	30103.1	17461.4	33436.4	12863.9	13933.8	5176.56	11476.8	22099.9	12872.3	15020.7	38939.2	27729.1	13897.9	39827.4	17237	447.22	447.219	447.221	64.9067	64.4953	65.3063	11	4	7
FT234	mz_447.26-71s	36475	21744.5	67075.4	31171.4	19325.6	36397.9	21736.9	79204	28634.2	59927.3	20702	25872.5	39853.4	58195.2	34821.1	116438	112074	64670.4	65164.9	45386.4	447.257	447.256	447.294	71.284	70.7196	78.8559	31	8	8
FT235	mz_448.28-75s	7694.91	12023	14292.6	10185.7	0	0	136.706	16793.1	0	33837.3	4985.47	5806.69	0	19606.5	0	27033.3	25403.2	14012.3	15474.7	12811.1	448.278	448.259	448.296	74.7975	70.9142	78.7696	16	4	6
FT236	mz_449.15-87s	37899.7	5852.31	34646.5	5768.96	29928.9	34152.9	34837.6	34478.2	48844.8	41858.1	39242.2	39855.3	23643	38708.5	37847.5	28463.5	39108.3	39513.4	33690.1	36197.3	449.149	449.148	449.236	87.4253	43.1881	87.6262	19	8	8
FT237	mz_463.22-51s	3638.6	2244.74	9950.12	11194.2	2936.43	7944.54	1877.37	3836.89	2516.85	6105.87	2037.64	1853.16	443.772	5288.97	41.8804	11437.4	12438.7	7178.76	7434.58	35336.9	463.215	463.214	463.261	51.1572	50.7594	90.2152	8	2	4
FT238	mz_471.13-87s	8830.06	1438.46	9240.56	1104.43	7063.3	7979.71	7799.78	10703.3	10381.5	7426.74	9212.42	10073.6	6662.92	9353.81	9903.23	9464.76	10328.8	9299.54	9691.86	9219.48	471.13	471.129	471.132	87.427	87.2262	87.8265	13	6	7
FT239	mz_477.23-59s	6325.5	3505.37	8372.02	4828.85	3324.15	9582.08	6318.32	12453.7	2953.72	8210.9	2889.02	4872.14	6530.79	4564.85	2749.91	14626.3	16122.5	5545.08	10228	6608.67	477.231	477.23	477.267	59.029	58.53	65.3056	10	3	4
FT240	mz_483.35-88s	51048.4	59385.3	141053	137922	6986.77	11338.1	10166.2	147436	13239.9	140778	54144.5	24297.6	33769	98545.2	17276.1	410779	274585	171681	69510.4	52277.2	483.352	483.279	483.354	88.4945	74.752	89.0195	28	8	8
FT241	mz_484.36-89s	12655.9	16414.4	33901.8	34858.2	813.901	2033.53	1953.36	40738.9	2782.41	36442	11950.9	4532.49	5837.85	26759.2	1119.83	99417.9	69243.1	44242.5	9999.2	14594.7	484.356	484.319	484.357	88.7199	80.8492	89.2042	14	2	6
FT242	mz_487.36-158s	20179	2159.89	18484.1	2180.55	22893.3	21427.8	20255.5	15795.2	21100.8	20432.4	18489.5	21037.6	18208.1	20769	20381.3	15134.6	19739.6	16619.4	16496.2	20524.4	487.36	487.36	487.361	158.163	157.952	158.559	11	4	7
FT243	mz_491.25-67s	8139.39	3690.81	10612.8	4744.09	6312.26	9237.41	9878.82	13363.6	5729.09	12060	2108.09	6425.95	12591.4	4736.98	5431.08	16983.6	14788.6	9556.89	14470.9	6343.06	491.246	491.246	491.283	66.6018	66.3348	73.0773	8	5	3
FT244	mz_500.36-85s	16382.2	24861.5	41191	41430.4	0	52.5101	43.6238	65448.8	4396.66	42870.8	18245.4	0	10972.2	32301.9	0	116845	85918.9	54213.9	11272.6	18003.7	500.361	500.306	500.38	85.1	74.8708	89.0042	20	4	7
FT245	mz_505.3-81s	22593.7	15494.1	41404.3	20604.9	9462.32	17615.9	11761.4	53384.1	13233.6	38820	14428.1	22044.2	28806.5	35273.8	19137.9	62768.6	81926.8	38545.7	34688.7	30086.7	505.298	505.261	505.336	81.0501	74.8672	89.2184	38	8	8
FT246	mz_506.34-89s	12202.7	15090.9	31547	29730.3	934.222	2594.06	1394.79	36498.1	2558.88	34960.7	13837.7	4843.07	6780.88	25041	1663.93	88463.5	60445	38579.6	18183.2	13219.2	506.338	506.264	506.339	88.8206	75.5553	89.0195	13	3	6
FT247	mz_541.38-94s	8166.01	11480.9	23337.8	12763.1	0	50.8574	0	23401.6	52.1958	16794.4	25029.1	0	14647.3	48079	9023.47	28567.8	33233.9	17673.7	14019.6	21457.6	541.376	541.322	541.396	94.3995	84.0373	98.7833	20	3	8
FT248	mz_542.4-99s	6111.32	7892.61	18556.9	19354.4	572.383	1275.78	599.405	19308.3	1234.02	17815.5	6057.1	2028.15	3575.37	11439.7	532.305	56006.7	38706.9	21248.4	9705.49	7240.62	542.398	542.397	542.399	98.5845	98.5835	98.5931	7	2	5
FT249	mz_549.29-76s	5025.22	2644	7925.31	3314.19	2125.51	7789.39	3774.95	5878.7	3792.24	9893.65	4001.84	2945.49	8732.82	4703.29	3937.85	14455.7	9844.43	7311.98	6154.46	8261.97	549.288	549.287	549.325	76.0818	76.0665	82.4427	5	1	4
FT250	mz_557.09-230s	17562	8721.45	18717.5	9582.93	16515.8	14411	19488.4	14201.5	15855.9	37776.2	13572.5	8675.06	15898.7	15072.5	33188.5	24671.7	23413.6	2073.4	11561.6	23860.2	557.094	557.093	557.096	230.34	229.9	231.433	12	6	6
FT251	mz_558.1-230s	7813.51	4115.12	8874.26	4661.17	7068.81	7069.44	10926.7	4760.56	6939.7	16546.7	5193.05	4003.07	6548.03	7399.81	15623.5	13065	8956.93	556.101	7015.46	11829.3	558.095	558.094	558.096	230.437	230.096	231.231	8	4	4
FT252	mz_558.42-99s	5495.24	6974.37	16877	17420.7	660.861	1210.63	432.95	17671.7	815.21	15185.6	5500.91	2484.15	3350.49	13415.1	865.082	48040.9	36502.9	22809.3	5256.66	4775.64	558.421	558.385	558.422	98.5841	90.4141	98.7896	7	2	4
FT253	mz_563.34-90s	8265.5	6129.52	20708.8	11102.8	2777.32	5667.22	3250.01	14090.9	4341.26	20444.2	8967.33	6585.73	13738.3	20243.2	10354.9	33960.8	40803.9	19995.5	16184.4	10389.6	563.34	563.303	563.341	90.4141	83.839	90.616	15	4	8
FT254	mz_563.38-99s	21982.6	26274.3	65379.8	64726.8	2657.27	5073.7	2405.01	64471	5369.23	61517.3	24232.5	10134.6	14982.7	44867.1	5215.78	190562	127521	83999.9	33647.8	22242	563.377	563.375	563.378	98.5856	98.3846	98.7922	11	3	8
FT255	mz_564.38-99s	6517.85	7811.25	19340.3	19803.4	648.73	958.333	1114.73	20553.4	1650.17	16732.5	6704.69	3780.17	3513.27	14343.6	1568.28	55458.4	40901.5	25887.9	9090.41	3958.78	564.38	564.379	564.381	98.5846	98.3848	98.5931	8	3	5
FT256	mz_570.72-213s	7764.9	3621.56	16065.1	10565.5	6179.59	15794.4	8564.08	4721.21	8768.63	5506.59	4796.24	7788.42	9455.95	4912.05	6209.65	33953.3	21009.7	19151.1	25881.3	7947.57	570.716	570.715	570.716	212.96	212.959	213.359	7	1	6
FT257	mz_571.05-213s	7923.61	3535.17	15303	10014.4	4048.06	15383.9	9051.43	6614.02	6389.37	6670.61	5412.79	9818.71	8257.98	5245.67	7247.81	31440.6	21742.5	17938.7	24696.5	5854.43	571.05	571.048	571.052	213.158	212.755	213.756	9	4	5
FT258	mz_590.06-219s	13651.4	7208.21	27253.9	16022.1	9795.34	29063.7	19067.4	11276.9	9524.68	10099.6	6819.39	13563.9	17559.2	9641.43	15659.9	49126.1	38481.8	32297.3	45354.9	9910.36	590.064	590.063	590.064	219.334	218.937	219.762	12	5	7
FT259	mz_590.4-220s	13536.9	7320.85	21056.4	15813	10864.8	31200.5	13924.5	10946.4	10982.5	8414.62	9689.93	12272.1	15285.4	9634.58	15505.8	48782.9	35484.8	31633.3	3119.17	9004.87	590.398	590.397	590.473	219.536	219.137	243.445	11	4	6
FT260	mz_599.44-108s	7035.09	8383.39	24244.8	25281.7	859.819	918.7	582.354	23145.8	2580.28	16168.9	8233.4	3791.37	2586.91	18953.1	775.658	71710.9	50480.3	30311.6	12521.5	6618.34	599.436	599.436	599.438	107.751	107.75	107.95	6	2	4
FT261	mz_609.41-226s	19546.1	12039.4	35727.5	20951.8	12043.6	44309.8	26771.6	7277.02	17890.8	12370.9	11434	24271.2	20398.7	10816.4	24447.4	60405.1	56626	37480.7	60543.7	15101.6	609.411	609.41	609.411	226.471	226.108	227.091	12	5	7
FT262	mz_609.75-226s	20894.9	10871.9	35756	22438.7	15995.3	44931.5	26047.1	13469.1	12779.5	14068.3	16085.1	23783.4	19917.4	10240.5	22311.7	68150.2	53767.2	43516	56457.6	11687.9	609.745	609.745	609.748	226.408	225.846	227.604	14	7	7
FT263	mz_610.08-226s	9340.59	5496.85	18899.5	12601	6565.36	21890.3	12129.7	5306.76	7387.35	5721.42	7164.81	8558.96	6971.07	6806.84	13270.6	36723.9	30343.6	21158	30918.1	5004.31	610.08	610.079	610.081	226.311	226.301	227.101	7	3	4
FT264	mz_610.18-260s	40903.7	14376.1	35731.9	15340.5	34837.2	32216.3	39736.6	30049.3	48285.7	72872.7	40077.4	29154.2	30651.5	37583.8	60110.1	40418.4	41829.7	6794.69	26398.2	42068.6	610.184	610.183	610.185	259.98	259.382	262.479	15	8	7
FT265	mz_611.18-260s	21592.1	8592.09	19941.7	9108.92	17361.8	15266.8	22001.2	19301.6	23390.9	41202.7	20668.3	13543.2	17315.8	22039.1	35947.5	21754.9	23681	3302.85	15559.1	19933.7	611.185	611.183	611.186	259.781	259.375	262.479	15	8	7
FT266	mz_612.18-260s	15397.6	6365.09	13562.2	7212.65	11466	12549.9	18208.7	11825.1	18723.8	27753.6	15936.5	6717.41	6869.69	13761.8	26188.8	16791	15692.3	2652.96	9682.23	16858.9	612.183	612.182	612.184	260.198	259.578	262.681	10	6	4
FT267	mz_621.38-99s	3879.07	4027.01	11684.2	8399.3	1034.54	421.692	1123.97	11575	1762.25	8369.72	4237.4	2508	5791.65	9610.35	5202.46	14545.8	16090.2	29741.1	6259.75	6232.23	621.382	621.343	621.42	99.1828	92.2106	107.95	19	3	7
FT268	mz_622.42-108s	2679.4	3697.57	8676.57	9442.5	534.71	639.008	167.301	9902.37	411.316	7115.96	1366.93	1297.6	799.781	6252.01	540.238	26584.7	18055	11688.5	3730.41	1761.97	622.422	622.385	622.422	107.751	98.983	108.149	7	2	4
FT269	mz_628.76-235s	23118.7	14637.5	43278	22774.6	15050.6	51000.1	36902.7	9096.42	19763.6	14849.9	10214	28072.3	27392.3	16829.8	33359.7	72841.2	56652.6	52245.5	70351.3	16551.3	628.758	628.757	628.759	234.601	233.883	235.085	12	4	8
FT270	mz_629.09-235s	24376	12695.2	42920.1	27274.9	12845.2	49079.3	36378.2	12534.1	17716.2	20741.3	18469.4	27244.6	27767.3	16590.8	17664.4	75040	69146.6	50798	73714.2	12639.9	629.093	629.091	629.094	234.675	234.08	235.284	12	6	6
FT271	mz_629.43-235s	12022.6	6175.97	23016.8	13936.5	8431.77	24586.6	14336.7	4460.86	10440.3	7919.34	10507.4	15498	13931.6	7608.81	16283.7	41058.4	38275	25616.6	35142.2	6217.86	629.427	629.426	629.427	234.567	233.682	235.266	10	4	6
FT272	mz_629.76-234s	4186.83	2182.14	9218.41	5595.89	2993.42	9212.98	4775.72	2694.98	3745.82	3107.02	2554.9	4409.81	5307.06	3806.78	6174.58	17571.6	14385.2	11096.9	13214	2191.09	629.761	629.76	629.762	234.479	234.078	234.878	4	0	4
FT273	mz_631.11-260s	20818.9	8800.29	19909.6	8865.26	17047	14915.7	20270.8	18528.2	22808	40407.8	21706.1	10867.7	17993.5	18822.9	35049.3	21745.2	23922.8	2976.26	17224.8	21542.1	631.113	631.112	631.114	260.128	259.382	262.277	13	7	6
FT274	mz_632.11-260s	9410.62	5509.67	11018.7	5163.71	6718.13	5237.2	7906.63	7834.4	11176.9	22361.5	7679.27	6370.94	10811.2	12214.1	19966.4	14312.9	11427	1980.66	9673.91	7762.99	632.114	632.113	632.115	259.581	259.564	260.268	5	1	4
FT275	mz_633.11-260s	8712.96	4661.93	8726.25	4945.16	7813.4	5994.52	7089.5	4976.43	10052.2	19550.4	8334.19	5893.08	6794.16	8386.62	17115.4	9253.29	10683.6	1292.99	3845.98	12438	633.111	633.11	633.113	260.45	259.564	262.479	6	4	2
FT276	mz_648.11-244s	21787.6	15769.3	42362.6	24087.1	12468.9	57954.5	28627.9	9283.62	18934.9	12500.7	15344.3	19186.2	23469.1	15790.2	31870.9	58946.1	70460.8	49765.8	73975.5	14622.8	648.105	648.105	648.106	243.844	243.246	244.981	7	2	5
FT277	mz_648.44-244s	25527.6	16772.4	48077.6	26280.3	14401.5	61195.6	35557.7	11408.9	20869.7	15661	14297.7	30829	30372.2	17182.6	42346.2	73400	76212.6	55207.5	76813.3	13086.6	648.44	648.439	648.441	243.844	243.445	244.981	10	3	7
FT278	mz_667.45-255s	19226.7	12705.3	40283.8	24635.1	12491.5	46765.6	26727.1	7283.4	15755.8	12657.1	10960.8	21172.8	20435.6	12061	38367.7	56302.3	72624.4	46663.1	67059.5	8756.86	667.452	667.452	667.453	254.501	254.247	255.932	6	1	5
FT279	mz_667.79-254s	22174	15830.3	45809.4	28785.4	9254.39	55055.5	34588.4	9514.65	18539.1	14486.5	11489.8	24463.8	19683.5	12535.4	42992.6	66924.4	78292.7	54961.6	80310.3	10774.4	667.787	667.787	667.788	254.402	254.204	255.932	5	1	4
FT280	mz_684.2-227s	18545.4	8946.82	19202.1	4417.7	1535.09	19389.4	19166.4	21670.3	16501	33286.1	22800.5	14014.1	19460.7	16698.8	15644	25861.8	16990.4	24229.4	13102.2	21629.8	684.203	684.202	684.204	226.906	226.312	229.882	12	6	6
FT281	mz_685.2-228s	11286	5624.73	11115	2195.97	1181.31	10628.9	11335.7	9760.95	10555.1	21040.8	15698.5	10086.9	10963.5	9764.21	9527.3	13849.8	11634	13818	7420.62	11942.2	685.203	685.203	685.204	227.505	226.11	228.496	5	4	1
FT282	mz_685.44-195s	20201	5141.86	20074.6	1212.93	10007.7	23722.2	18018.9	27939.4	20955.6	21390.1	20735.2	18838.7	20804.9	21283.9	18919.1	20340	20261.2	20922	17623.3	20442.3	685.435	685.434	685.437	195.424	194.427	199.609	14	6	8
FT283	mz_686.44-195s	7834.5	2262.41	6475.94	2058.85	2442.71	8833.82	8281.61	8811.44	8505.47	9686.8	8615.96	7498.18	4304.63	5652.96	6584.56	10479.9	6801.1	7037.32	7177.24	3769.73	686.439	686.437	686.44	195.325	194.626	197.425	6	4	2
FT284	mz_705.13-227s	20474.1	9755.36	21520.6	5035.31	1351.14	20362.3	18839.7	21427.2	20465.2	36832.5	25643.6	18870.9	22783.3	18704.2	18281.2	27605.6	16308.7	29304.6	16038	23139.3	705.133	705.131	705.134	227.103	226.308	230.081	15	7	8
FT285	mz_706.13-228s	11681.3	5996.91	13105.3	3463.64	573.685	11852.9	12062.4	10658.9	12673.3	22881	11891.2	10857.1	11557.2	10728.1	11404.9	16259.5	11262.5	19002.9	8874.37	15753.2	706.133	706.132	706.135	227.506	226.311	230.281	11	7	4
FT286	mz_707.13-227s	10800.2	4384.65	10829.1	2272.08	4540.27	12283.4	8988.16	8052.51	9159.24	19262.5	13621.3	10493.8	9107.91	11151.8	11535.6	15465.6	10081.8	11069.9	7602.28	10618	707.131	707.13	707.169	227.3	195.026	229.882	9	5	4
FT287	mz_728.5-194s	6715.97	3424.18	9926.34	7500.42	5216.06	12678.7	7516.75	10963.5	2856.7	5007.86	4738.74	4749.41	5273.47	4263.34	3741.94	23745.5	16819	8489	13898.1	3180.3	728.496	728.496	728.498	194.028	193.805	194.233	7	4	3
FT288	mz_757.52-198s	7604.09	3613.65	13577.4	10143.3	4491.99	11585.4	7993.82	14455.2	6833.85	5245.82	5446.2	4780.48	6168.34	1898.01	6270.93	30399.8	22026.3	17860.4	18991.2	5004.59	757.517	757.516	757.519	198.015	198.014	198.214	6	2	4
FT289	mz_779.15-242s	11419.7	8281.68	16116.9	5888.4	0	56.3097	18974.8	18165.9	21026.5	14453.5	7361.07	11319.3	7528.37	10369.5	21313.8	17109.5	24762.7	20364.3	15134	12352.9	779.152	779.15	779.153	241.652	240.057	246.499	9	4	5
FT290	mz_786.54-202s	8596.85	4717.57	15962.9	11461.4	7839.43	17078.6	9297.63	13291.1	7850.03	2800.87	3732.08	6885.08	6454.61	3800.73	8615.05	36682.9	23994.8	18505.8	22709.4	6940.11	786.538	786.537	786.54	202.498	202.199	202.996	8	3	5
FT291	mz_815.56-208s	11314.8	4906.19	20002.8	12148.9	6629.99	22164.7	12485.6	12667.7	11067.9	9266.64	7436.57	8799.02	8556.55	7524.94	11622.3	39859.9	30411.6	22831.2	28698.2	10517.5	815.559	815.557	815.56	207.579	207.179	207.979	10	4	6
FT292	mz_816.06-207s	9580.93	4576.68	17249.2	11373.8	8323.57	19778.3	11824.9	9702.17	7246.21	7551.23	5027.18	7193.88	12094.8	5315.25	7690.38	36143.1	24908.4	22112.9	24726.2	5002.54	816.061	816.058	816.061	207.38	207.377	207.581	7	2	5
FT293	mz_844.58-213s	10381.9	5266.49	21360.5	14316.1	7907.51	22235.3	11436.8	9138.85	11621.6	8738.6	4983.12	6993.33	12624.8	5835.79	10891.5	45392.1	29083	25890.4	33790.1	7376.46	844.579	844.577	844.58	212.959	212.76	213.358	6	1	5
FT294	mz_845.08-213s	10840.3	6162.91	19320.6	13244	8521.2	25953.2	9572.15	9467.17	8242.72	9161.32	6962.38	8841.91	11382.4	6004.02	6957.58	41888.9	30282.6	24697	25683	7669.07	845.081	845.079	845.083	212.96	212.759	213.354	8	3	5
FT295	mz_873.6-219s	8844.35	6605.17	17297.7	12985.8	8150.84	24451.7	10264.3	7207.46	6283.78	4819.06	4089.32	5488.36	4794.23	7171.45	12501.7	41088.5	27021	16842.4	25015.1	3947.24	873.6	873.599	873.602	219.336	218.937	220.164	7	2	5
FT296	mz_874.1-219s	8712.29	5136.49	18628.7	12439.6	4994.01	19726.2	12216.3	7459.16	9182.9	6534.94	4867.77	4717.03	9068.48	5887.3	12290.1	38719.2	27238.5	23451.1	27942.4	4432.61	874.102	874.1	874.103	219.136	218.938	219.735	8	3	5
FT297	mz_902.62-227s	8659.15	6073.4	15872	10005.2	5607.93	22554.5	10144.7	3754.46	8204.05	4365.84	5406.49	9235.3	9588.12	4498.36	11274	30650.7	19100.3	18712.1	28256.5	4896.01	902.621	902.618	902.623	226.505	225.911	226.892	8	2	6
FT298	mz_903.12-226s	7997.31	5669.68	15235.9	10166	4881.89	21828.8	7647.4	4766.56	6438.83	5681.42	5959.98	6773.61	6250.83	4788.1	12668.7	26063.6	24300.8	16820.5	28242.7	2751.7	903.123	903.122	903.124	226.308	226.11	226.892	5	1	4
